# Supplementary material for: A Tyrosine Kinase Expression Signature Predicts the Post-Operative Clinical Outcome in Triple Negative Breast Cancers
Source: Cancers (Basel). 2019 Aug 13;11(8):1158. doi: 10.3390/cancers11081158 (PMC6721506; doi:10.3390/cancers11081158)
Supplement: Supplementary file 1 [file cancers-11-01158-s001.xlsx]

## Sheet: Table S1
Supplementary Table 1: List of 86 TK genes analysed and results of univariate prognostic analysis for DFS in the learning set (N=914)
Gene	Gene	Cytoband	Univariate DFS			Best model selection
Symbol	Description		N	HR [95%CI]	p-value*	by AIC
YES1	YES proto-oncogene 1, Src family tyrosine kinase	18p11.32	914	1.01 [0.89-1.14]	0.9
PTK2	protein tyrosine kinase 2	8q24.3	903	1.01 [0.93-1.1]	0.802
EPHA8	EPH receptor A8	1p36.12	675	0.79 [0.54-1.15]	0.223
EPHB1	EPH receptor B1	3q22.2	858	1.01 [0.92-1.1]	0.835
ALK	ALK receptor tyrosine kinase	2p23.2-p23.1	882	1.15 [1-1.32]	0.046	ok
LMTK2	lemur tyrosine kinase 2	7q21.3	877	1.02 [0.86-1.19]	0.854
ROS1	ROS proto-oncogene 1, receptor tyrosine kinase	6q22.1	895	1.3 [0.94-1.8]	0.109
EPHA2	EPH receptor A2	1p36.13	913	1.06 [0.9-1.24]	0.486
FRK	fyn related Src family tyrosine kinase	6q22.1	914	1.13 [0.94-1.36]	0.181
EPHB2	EPH receptor B2	1p36.12	914	0.99 [0.86-1.14]	0.923
EPHA4	EPH receptor A4	2q36.1	913	1.2 [1.08-1.34]	0.00088	ok
ATMIN	ATM interactor	16q23.2	858	0.95 [0.78-1.15]	0.585
MET	MET proto-oncogene, receptor tyrosine kinase	7q31.2	913	0.98 [0.92-1.04]	0.493
EGFR	epidermal growth factor receptor	7p11.2	858	0.98 [0.93-1.02]	0.321
PTK2B	protein tyrosine kinase 2 beta	8p21.2	914	0.66 [0.55-0.78]	2.07e-06	ok
JAK2	Janus kinase 2	9p24.1	858	0.79 [0.71-0.88]	1.64e-05
CSK	CSK, non-receptor tyrosine kinase	15q24.1	914	0.88 [0.73-1.07]	0.207
TXK	TXK tyrosine kinase	4p12	848	0.83 [0.66-1.03]	0.086
HCK	HCK proto-oncogene, Src family tyrosine kinase	20q11.21	914	0.88 [0.79-0.97]	0.0129
FLT3	fms related tyrosine kinase 3	13q12.2	853	0.72 [0.58-0.9]	0.00393
LYN	LYN proto-oncogene, Src family tyrosine kinase	8q12.1	858	0.87 [0.77-0.98]	0.027
ZAP70	zeta chain of T-cell receptor associated protein kinase 70	2q11.2	877	0.84 [0.76-0.93]	0.000718	ok
SYK	spleen associated tyrosine kinase	9q22.2	911	0.91 [0.81-1.03]	0.141
BTK	Bruton tyrosine kinase	Xq22.1	914	0.89 [0.81-0.98]	0.021
FGR	FGR proto-oncogene, Src family tyrosine kinase	1p35.3	910	0.78 [0.66-0.91]	0.00229
LCK	LCK proto-oncogene, Src family tyrosine kinase	1p35.2	914	0.88 [0.81-0.94]	0.000391
TYK2	tyrosine kinase 2	19p13.2	858	0.85 [0.71-1.03]	0.093
ITK	IL2 inducible T-cell kinase	5q33.3	858	0.85 [0.78-0.91]	2.82e-05	ok
BLK	BLK proto-oncogene, Src family tyrosine kinase	8p23.1	874	0.84 [0.74-0.96]	0.0115
MATK	megakaryocyte-associated tyrosine kinase	19p13.3	914	0.75 [0.62-0.91]	0.00312
JAK1	Janus kinase 1	1p31.3	914	0.92 [0.81-1.05]	0.215
JAK3	Janus kinase 3	19p13.11	902	1.01 [0.9-1.12]	0.908
EPHB6	EPH receptor B6	7q34	858	0.82 [0.71-0.93]	0.003	ok
NTRK1	neurotrophic receptor tyrosine kinase 1	1q23.1	908	1.16 [0.85-1.59]	0.337
RYK	receptor-like tyrosine kinase	3q22.2	858	1.09 [0.91-1.3]	0.372
DDR1	discoidin domain receptor tyrosine kinase 1	6p21.33	914	1.14 [0.94-1.39]	0.179
PTK7	protein tyrosine kinase 7 (inactive)	6p21.1	914	1.05 [0.92-1.19]	0.464
EPHB3	EPH receptor B3	3q27.1	858	1.03 [0.94-1.13]	0.495
EPHB4	EPH receptor B4	7q22.1	877	1.29 [1.09-1.54]	0.004	ok
ABL2	ABL proto-oncogene 2, non-receptor tyrosine kinase	1q25.2	914	1.16 [0.95-1.41]	0.134
SRC	SRC proto-oncogene, non-receptor tyrosine kinase	20q11.23	914	0.71 [0.58-0.87]	0.00103	ok
INSR	insulin receptor	19p13.2	914	1.01 [0.87-1.17]	0.867
IGF1R	insulin like growth factor 1 receptor	15q26.3	914	1.06 [0.97-1.15]	0.18
NTRK3	neurotrophic receptor tyrosine kinase 3	15q25.3	913	0.95 [0.86-1.05]	0.274
AATK	apoptosis associated tyrosine kinase	17q25.3	914	0.83 [0.65-1.06]	0.142
EPHA7	EPH receptor A7	6q16.1	849	1.24 [1.14-1.34]	2.86e-07	ok
KIT	KIT proto-oncogene receptor tyrosine kinase	4q12	913	0.99 [0.93-1.05]	0.714
FGFR3	fibroblast growth factor receptor 3	4p16.3	914	1.05 [0.98-1.12]	0.184
PDGFRB	platelet derived growth factor receptor beta	5q32	914	1.09 [0.95-1.26]	0.216
BMX	BMX non-receptor tyrosine kinase	Xp22.2	892	1.01 [0.76-1.34]	0.926
AXL	AXL receptor tyrosine kinase	19q13.2	914	0.95 [0.79-1.12]	0.526
TIE1	tyrosine kinase with immunoglobulin like and EGF like domains 1	1p34.2	914	1.01 [0.9-1.13]	0.855
CSF1R	colony stimulating factor 1 receptor	5q32	882	0.83 [0.73-0.96]	0.0109
TEK	TEK receptor tyrosine kinase	9p21.2	858	1.03 [0.91-1.17]	0.644
FYN	FYN proto-oncogene, Src family tyrosine kinase	6q21	866	0.8 [0.69-0.93]	0.00405	ok
FES	FES proto-oncogene, tyrosine kinase	15q26.1	914	0.86 [0.73-1.02]	0.09
PDGFRA	platelet derived growth factor receptor alpha	4q12	914	0.97 [0.88-1.07]	0.524
MERTK	MER proto-oncogene, tyrosine kinase	2q13	914	0.95 [0.82-1.1]	0.477
FER	FER tyrosine kinase	5q21.3	910	1.07 [0.88-1.31]	0.468
DDR2	discoidin domain receptor tyrosine kinase 2	1q23.3	876	1 [0.89-1.12]	0.999
KDR	kinase insert domain receptor	4q12	885	0.9 [0.78-1.02]	0.104
FLT1	fms related tyrosine kinase 1	13q12.3	821	1.24 [1.08-1.43]	0.0023	ok
ROR2	receptor tyrosine kinase like orphan receptor 2	9q22.31	914	0.93 [0.82-1.06]	0.28
TEC	tec protein tyrosine kinase	4p12-p11	867	1.2 [0.78-1.87]	0.409
EPHA3	EPH receptor A3	3p11.1	906	1.06 [0.98-1.15]	0.118
ABL1	ABL proto-oncogene 1, non-receptor tyrosine kinase	9q34.12	858	1.03 [0.82-1.28]	0.818
FLT4	fms related tyrosine kinase 4	5q35.3	908	1.12 [0.96-1.31]	0.136
MUSK	muscle associated receptor tyrosine kinase	9q31.3	909	0.77 [0.54-1.09]	0.142
FGFR1	fibroblast growth factor receptor 1	8p11.23	877	0.97 [0.9-1.05]	0.52
NTRK2	neurotrophic receptor tyrosine kinase 2	9q21.33	902	0.98 [0.9-1.05]	0.517
LTK	leukocyte receptor tyrosine kinase	15q15.1	913	1.03 [0.9-1.18]	0.646
SRMS	src-related kinase lacking C-terminal regulatory tyrosine and N-terminal myristylation sites	-	553	1.64 [0.98-2.74]	0.061
PTK6	protein tyrosine kinase 6	20q13.33	858	1.01 [0.93-1.1]	0.776
ERBB2	erb-b2 receptor tyrosine kinase 2	17q12	914	1 [0.9-1.12]	0.936
LMTK3	lemur tyrosine kinase 3	19q13.33	574	0.88 [0.78-0.99]	0.0307
MST1R	macrophage stimulating 1 receptor	3p21.31	914	1.04 [0.92-1.17]	0.501
ERBB3	erb-b2 receptor tyrosine kinase 3	12q13.2	914	1.02 [0.92-1.12]	0.74
FGFR4	fibroblast growth factor receptor 4	5q35.2	914	1 [0.93-1.08]	0.924
TNK1	tyrosine kinase non receptor 1	17p13.1	871	1.03 [0.82-1.3]	0.802
EPHA1	EPH receptor A1	7q34-q35	903	0.84 [0.71-1]	0.0497	ok
EPHA6	EPH receptor A6	3q11.2	643	1.1 [0.64-1.88]	0.738
RET	ret proto-oncogene	10q11.21	821	0.99 [0.9-1.08]	0.774
EPHA10	EPH receptor A10	1p34.3	553	0.71 [0.54-0.94]	0.0179
INSRR	insulin receptor related receptor	1q23.1	850	0.77 [0.5-1.18]	0.231
STYK1	serine/threonine/tyrosine kinase 1	12p13.2	883	0.96 [0.88-1.06]	0.425
ERBB4	erb-b2 receptor tyrosine kinase 4	2q34	903	0.93 [0.89-0.97]	0.000654	ok
* Cox regression with Wald test

## Sheet: Table S2
Supplementary Table 2: List of 480 genes differentially expressed between the “low-risk” and “high-risk” TNBC samples as defined by our 13-gene classifier in the Metabric data set (N=335)
(moderated t-test, p<1%, q<1% & |FC|>1.25x)
PID	Gene.Symbol	Gene.Title	Cytoband	Entrez	GeneID	Low-risk (mean log2)	High-risk (mean log2)	High- vs. low-risk (log2-ratio)	t	p-value	q- value	Expression status
ILMN_1665066	C4orf14	Chromosome 4 open reading frame 14	4q12	84273	GeneID:84273	8.5203	8.88317	0.362875	6.13176	2.43963e-09	1.90792e-06	up high- vs. low-risk
ILMN_1811836	DYNC2LI1	Dynein, cytoplasmic 2, light intermediate chain 1	2p21	51626	GeneID:51626	6.87724	7.27186	0.394621	5.95452	6.57276e-09	3.53535e-06	up high- vs. low-risk
ILMN_1751726	LOC649049	Ribosomal protein, large, P0	12q24.31	649049	GeneID:649049	11.7215	12.1559	0.434332	5.64906	3.44253e-08	1.03202e-05	up high- vs. low-risk
ILMN_1660439	LOC651149	Ribosomal protein L3	10q26.12	651149	GeneID:651149	8.56019	9.11838	0.558191	5.57293	5.14705e-08	1.42432e-05	up high- vs. low-risk
ILMN_1709880	RPLP0	Ribosomal protein, large, P0	12q24.31	6175	GeneID:6175	12.2633	12.8686	0.605237	5.56612	5.33447e-08	1.43212e-05	up high- vs. low-risk
ILMN_1748109	PEX1	Peroxisomal biogenesis factor 1	7q21.2	5189	GeneID:5189	6.73902	7.07686	0.337846	5.54908	5.83313e-08	1.50613e-05	up high- vs. low-risk
ILMN_1695092	WRB	Tryptophan rich basic protein	21q22.2	7485	GeneID:7485	7.79322	8.204	0.410779	5.53677	6.22129e-08	1.51221e-05	up high- vs. low-risk
ILMN_1673380	GNG12	Guanine nucleotide binding protein (G protein), gamma 12	1p31.3	55970	GeneID:55970	6.64072	7.05771	0.41699	5.43287	1.06684e-07	2.08581e-05	up high- vs. low-risk
ILMN_1740861	DTWD1	DTW domain containing 1	15q21.2	56986	GeneID:56986	7.17706	7.51615	0.339093	5.36266	1.52907e-07	2.71157e-05	up high- vs. low-risk
ILMN_1666713	LYPLA1	Lysophospholipase I	8q11.23	10434	GeneID:10434	6.78453	7.22759	0.443056	5.36156	1.53765e-07	2.71157e-05	up high- vs. low-risk
ILMN_2116366	RPL12	Ribosomal protein L12	9q33.3	6136	GeneID:6136	13.2503	13.6174	0.367034	5.31948	1.90441e-07	3.05847e-05	up high- vs. low-risk
ILMN_2262288	EEF1G	Eukaryotic translation elongation factor 1 gamma	11q12.3	1937	GeneID:1937	11.246	11.8438	0.597785	5.31423	1.95576e-07	3.06147e-05	up high- vs. low-risk
ILMN_1665148	LOC648249	Ribosomal protein SA	3p22.1	648249	GeneID:648249	11.3135	11.7722	0.45872	5.22363	3.08487e-07	4.17203e-05	up high- vs. low-risk
ILMN_1708627	LOC653226	Homo sapiens clone 24452 mRNA sequence.	1q42.12	653226	GeneID:653226	9.622	10.1897	0.567713	5.21414	3.23466e-07	4.34198e-05	up high- vs. low-risk
ILMN_2079386	RPL22	Ribosomal protein L22	1p36.31	6146	GeneID:6146	10.5817	11.0149	0.433147	5.14143	4.63968e-07	5.60099e-05	up high- vs. low-risk
ILMN_1716583	NME7	Non-metastatic cells 7, protein expressed in (nucleoside-diphosphate kinase)	1q24.2	29922	GeneID:29922	7.03778	7.37489	0.337102	5.10303	5.60456e-07	6.54612e-05	up high- vs. low-risk
ILMN_2325574	CASC4	Cancer susceptibility candidate 4	15q15.3	113201	GeneID:113201	7.12375	7.47502	0.351276	5.05981	6.92294e-07	7.73442e-05	up high- vs. low-risk
ILMN_1691053	LOC91561	Ribosomal protein S2	11p15.1	91561	GeneID:91561	7.73618	8.20129	0.465111	5.04986	7.26674e-07	7.90897e-05	up high- vs. low-risk
ILMN_1720996	SLC12A2	Solute carrier family 12 (sodium/potassium/chloride transporters), member 2	5q23.3	6558	GeneID:6558	7.12523	7.68922	0.563985	5.02992	8.00578e-07	8.34859e-05	up high- vs. low-risk
ILMN_1695370	LOC645968	Ribosomal protein S3A	7q21.3	645968	GeneID:645968	6.41324	6.81549	0.402253	5.01057	8.79182e-07	8.83465e-05	up high- vs. low-risk
ILMN_2150352	CBWD5	COBW domain containing 1	9q12	220869	GeneID:220869	7.40688	7.76993	0.363048	4.98072	1.01532e-06	9.76618e-05	up high- vs. low-risk
ILMN_2232936	UQCRH	Ubiquinol-cytochrome c reductase hinge protein	1p33	7388	GeneID:7388	11.4932	11.8906	0.397318	4.96396	1.10049e-06	0.000103191	up high- vs. low-risk
ILMN_2207539	RPS17	Ribosomal protein S17	15q25.2	6218	GeneID:6218	11.503	11.869	0.36594	4.91977	1.35941e-06	0.000119144	up high- vs. low-risk
ILMN_1754303	RPL30	Ribosomal protein L30	8q22.2	6156	GeneID:6156	12.7866	13.1555	0.368891	4.86462	1.76586e-06	0.000140543	up high- vs. low-risk
ILMN_1787949	RPS15A	Ribosomal protein S15a	16p12.3	6210	GeneID:6210	12.9986	13.3911	0.392517	4.86209	1.78709e-06	0.000141324	up high- vs. low-risk
ILMN_1692177	TSC22D1	TSC22 domain family, member 1	13q14.11	8848	GeneID:8848	8.44978	9.06191	0.612125	4.85405	1.8562e-06	0.000143747	up high- vs. low-risk
ILMN_1678652	C10orf61	Tectonic family member 3	10q23.33	26123	GeneID:26123	7.02022	7.39457	0.374354	4.83042	2.07447e-06	0.000150892	up high- vs. low-risk
ILMN_1700316	LOC440055	Ribosomal protein S12	11q13.4	440055	GeneID:440055	10.4166	10.9249	0.508308	4.83005	2.07801e-06	0.000150892	up high- vs. low-risk
ILMN_1772888	LOC645688	Homo sapiens cDNA FLJ33664 fis, clone BRAMY2027451, moderately similar to 60S RIBOSOMAL PROTEIN L12.	17q23.2	645688	GeneID:645688	10.9729	11.3219	0.349032	4.82712	2.1068e-06	0.000150892	up high- vs. low-risk
ILMN_1672961	LOC652624	Ribosomal protein SA	3p22.1	652624	GeneID:652624	11.8112	12.2321	0.420857	4.82186	2.15944e-06	0.000151728	up high- vs. low-risk
ILMN_2395974	PRDX3	Peroxiredoxin 3	10q26.11	10935	GeneID:10935	9.29297	9.82641	0.533442	4.81744	2.20468e-06	0.000152523	up high- vs. low-risk
ILMN_1694587	EEF1B2	Eukaryotic translation elongation factor 1 beta 2	2q33.3	1933	GeneID:1933	11.1535	11.5842	0.430747	4.81441	2.23619e-06	0.000154038	up high- vs. low-risk
ILMN_1787657	CLDN12	Claudin 12	7q21.13	9069	GeneID:9069	7.45783	7.78823	0.330403	4.81077	2.27461e-06	0.00015479	up high- vs. low-risk
ILMN_1657423	SPG21	Spastic paraplegia 21 (autosomal recessive, Mast syndrome)	15q22.31	51324	GeneID:51324	8.21792	8.63434	0.416421	4.81038	2.27879e-06	0.00015479	up high- vs. low-risk
ILMN_1769277	LOC651436	Homo sapiens cDNA FLJ27456 fis, clone TST99901, highly similar to 60S ribosomal protein L9.	4p14	651436	GeneID:651436	12.0282	12.4063	0.37808	4.81022	2.28047e-06	0.00015479	up high- vs. low-risk
ILMN_1710885	LOC387867	Ribosomal protein SA	3p22.1	387867	GeneID:387867	11.8207	12.2365	0.415858	4.79336	2.46745e-06	0.000163439	up high- vs. low-risk
ILMN_1764087	SYPL1	Synaptophysin-like 1	7q22.2	6856	GeneID:6856	8.56242	8.98997	0.427544	4.75276	2.98028e-06	0.000188094	up high- vs. low-risk
ILMN_1744347	LOC127295	RPL36P5 ribosomal protein L36 pseudogene 5	19p13.3	127295	GeneID:127295	10.8717	11.2059	0.334147	4.73725	3.202e-06	0.000197822	up high- vs. low-risk
ILMN_1753279	HNRNPA0	Heterogeneous nuclear ribonucleoprotein A0	5q31.2	10949	GeneID:10949	8.82265	9.17826	0.355614	4.72998	3.31143e-06	0.000203288	up high- vs. low-risk
ILMN_1726391	MRPL39	Mitochondrial ribosomal protein L39	21q21.3	54148	GeneID:54148	8.12018	8.47721	0.35703	4.72803	3.34141e-06	0.000204014	up high- vs. low-risk
ILMN_1660602	C1orf43	Chromosome 1 open reading frame 43	1q21.3	25912	GeneID:25912	7.14366	7.56589	0.422226	4.718	3.49957e-06	0.000210526	up high- vs. low-risk
ILMN_2348093	ATP5J	ATP synthase, H+ transporting, mitochondrial F0 complex, subunit F6	21q21.3	522	GeneID:522	10.9749	11.3091	0.334198	4.70206	3.76585e-06	0.000220642	up high- vs. low-risk
ILMN_1659550	LOC388654	Ribosomal protein SA pseudogene 19	4q21.21	388654	GeneID:388654	11.1838	11.7791	0.595346	4.68997	3.9808e-06	0.000225878	up high- vs. low-risk
ILMN_1684771	PGRMC1	Progesterone receptor membrane component 1	Xq24	10857	GeneID:10857	10.7574	11.1084	0.351036	4.68279	4.11397e-06	0.00023175	up high- vs. low-risk
ILMN_1815292	RPL7	Ribosomal protein L7	8q21.11	6129	GeneID:6129	8.25981	8.74102	0.481216	4.67697	4.22507e-06	0.000236016	up high- vs. low-risk
ILMN_1764500	C3orf10	Chromosome 3 open reading frame 10	3p25.3	55845	GeneID:55845	9.11331	9.50023	0.386917	4.66683	4.42562e-06	0.000242696	up high- vs. low-risk
ILMN_1810577	RPS4X	Ribosomal protein S4, X-linked	Xq13.1	6191	GeneID:6191	11.7116	12.1327	0.421129	4.62332	5.39462e-06	0.000281491	up high- vs. low-risk
ILMN_1652490	MANSC1	MANSC domain containing 1	12p13.2	54682	GeneID:54682	6.41604	6.79349	0.377454	4.61688	5.55419e-06	0.000283142	up high- vs. low-risk
ILMN_1732074	LOC648210	full-length cDNA clone CS0DA005YA17 of Neuroblastoma of Homo sapiens (human).	5q14.1	648210	GeneID:648210	11.5599	12.0638	0.503884	4.61554	5.58816e-06	0.000283142	up high- vs. low-risk
ILMN_1756360	RPL35A	Ribosomal protein L35a	3q29	6165	GeneID:6165	12.6098	12.9698	0.360052	4.61295	5.65401e-06	0.000284873	up high- vs. low-risk
ILMN_1713668	TSNAX	Translin-associated factor X	1q42.2	7257	GeneID:7257	7.5056	7.87294	0.367344	4.56649	6.97089e-06	0.000327903	up high- vs. low-risk
ILMN_2119945	NDUFB3	NADH dehydrogenase (ubiquinone) 1 beta subcomplex, 3, 12kDa	2q33.1	4709	GeneID:4709	10.5592	10.8836	0.32442	4.55641	7.29338e-06	0.000336927	up high- vs. low-risk
ILMN_1807710	HINT1	Histidine triad nucleotide binding protein 1	5q31.1	3094	GeneID:3094	11.8007	12.1687	0.368039	4.53874	7.8932e-06	0.000356725	up high- vs. low-risk
ILMN_1658283	RPL17	Ribosomal protein L17	18q21.1	6139	GeneID:6139	12.7321	13.1069	0.374799	4.49352	9.65199e-06	0.00041238	up high- vs. low-risk
ILMN_1778561	WEE1	WEE1 homolog (S. pombe)	11p15.4	7465	GeneID:7465	7.34546	7.66882	0.323358	4.48168	1.01713e-05	0.000429466	up high- vs. low-risk
ILMN_1651680	LOC649150	Eukaryotic translation elongation factor 1 alpha 1	6q13	649150	GeneID:649150	13.7017	14.0916	0.389809	4.47777	1.03488e-05	0.000433905	up high- vs. low-risk
ILMN_1783684	LOC648695	Retinoblastoma binding protein 4	1p35.1	648695	GeneID:648695	8.45173	8.84815	0.396423	4.47405	1.05203e-05	0.000439051	up high- vs. low-risk
ILMN_1685538	LOC158345	Ribosomal protein L4	15q22.31	158345	GeneID:158345	9.66041	10.0133	0.352862	4.45666	1.13582e-05	0.000464322	up high- vs. low-risk
ILMN_1679796	TOMM20	Translocase of outer mitochondrial membrane 20 homolog (yeast)	1q42.3	9804	GeneID:9804	9.67939	10.1134	0.434013	4.44107	1.21637e-05	0.000488816	up high- vs. low-risk
ILMN_1695034	LOC642817	Heterogeneous nuclear ribonucleoprotein A1-like 2	6p25.1	642817	GeneID:642817	10.8677	11.3467	0.479	4.44007	1.22176e-05	0.000489443	up high- vs. low-risk
ILMN_1706326	MRPL33	Mitochondrial ribosomal protein L33	2p23.2	9553	GeneID:9553	10.3036	10.6447	0.341143	4.42421	1.30969e-05	0.000516614	up high- vs. low-risk
ILMN_1658531	LOC653702	Ribosomal protein L7	1p21.3	653702	GeneID:653702	6.31678	6.64686	0.330083	4.38985	1.52145e-05	0.000566595	up high- vs. low-risk
ILMN_1764861	ISOC1	Isochorismatase domain containing 1	5q23.3	51015	GeneID:51015	7.54742	7.90156	0.354146	4.38057	1.58403e-05	0.000582545	up high- vs. low-risk
ILMN_2225537	PTGR1	Prostaglandin reductase 1	9q31.3	22949	GeneID:22949	7.86921	8.2778	0.408592	4.3528	1.78641e-05	0.000633908	up high- vs. low-risk
ILMN_1719224	C17orf45	Chromosome 17 open reading frame 45	17p11.2	125144	GeneID:125144	11.892	12.2583	0.366292	4.35136	1.7975e-05	0.000635204	up high- vs. low-risk
ILMN_1808041	RPL10A	Ribosomal protein L10a	6p21.31	4736	GeneID:4736	9.90639	10.3941	0.487714	4.34772	1.82596e-05	0.000641483	up high- vs. low-risk
ILMN_2409395	CCNC	Cyclin C	6q16.3	892	GeneID:892	7.75059	8.1918	0.441214	4.34414	1.85439e-05	0.000644957	up high- vs. low-risk
ILMN_2128967	C11orf1	Chromosome 11 open reading frame 1	11q23.1	64776	GeneID:64776	8.51733	8.84518	0.327859	4.34369	1.858e-05	0.000644957	up high- vs. low-risk
ILMN_1776005	DC2	Oligosaccharyltransferase complex subunit	4q25	58505	GeneID:58505	9.90032	10.3667	0.466372	4.3406	1.88294e-05	0.000650072	up high- vs. low-risk
ILMN_1672191	ATP5F1	ATP synthase, H+ transporting, mitochondrial F0 complex, subunit B1	1p13.2	515	GeneID:515	8.35396	8.73499	0.381025	4.33435	1.93425e-05	0.00066299	up high- vs. low-risk
ILMN_2218277	RPS2	Ribosomal protein S2	16p13.3	6187	GeneID:6187	12.3706	12.7145	0.34397	4.3099	2.14833e-05	0.000716926	up high- vs. low-risk
ILMN_1765725	SBDSP	Shwachman-Bodian-Diamond syndrome	7q11.21	155370	GeneID:155370	7.23105	7.56267	0.331614	4.29018	2.33741e-05	0.000768618	up high- vs. low-risk
ILMN_1750394	SLC39A6	Solute carrier family 39 (zinc transporter), member 6	18q12.2	25800	GeneID:25800	7.25215	7.60225	0.3501	4.28236	2.41667e-05	0.000788117	up high- vs. low-risk
ILMN_1801795	LOC347544	RPL18AP16 ribosomal protein L18a pseudogene 16	Xq28	347544	GeneID:347544	11.1897	11.5762	0.386464	4.27881	2.4535e-05	0.000796121	up high- vs. low-risk
ILMN_1689712	LOC440927	Ribosomal protein, large, P1	2q31.1	440927	GeneID:440927	11.0199	11.3862	0.366338	4.27599	2.48314e-05	0.00080188	up high- vs. low-risk
ILMN_1667813	LOC648000	Ribosomal protein L7	8q21.11	648000	GeneID:648000	12.2739	12.6907	0.416792	4.27393	2.50494e-05	0.000806027	up high- vs. low-risk
ILMN_2357770	TCEA1	Transcription elongation factor A (SII), 1	8q11.23	6917	GeneID:6917	8.31354	8.71808	0.404538	4.26549	2.59645e-05	0.000822232	up high- vs. low-risk
ILMN_1687864	POP5	Processing of precursor 5, ribonuclease P/MRP subunit (S. cerevisiae)	12q24.31	51367	GeneID:51367	7.62068	7.94598	0.325298	4.2632	2.62185e-05	0.000826533	up high- vs. low-risk
ILMN_1757278	LOC643300	Heat shock 60kDa protein 1 (chaperonin)	2q33.1	643300	GeneID:643300	6.53279	6.88443	0.351634	4.22451	3.08811e-05	0.00093419	up high- vs. low-risk
ILMN_1692545	LOC646849	NPM1P28 nucleophosmin 1 pseudogene 28	3q24	646849	GeneID:646849	8.3173	8.68415	0.366848	4.2142	3.22523e-05	0.000970115	up high- vs. low-risk
ILMN_1789809	LOC644511	Ribosomal protein L13a (Ribosomal protein L13a, isoform CRA_b).	19q13.33	644511	GeneID:644511	11.2821	11.6298	0.347697	4.20932	3.29198e-05	0.000981348	up high- vs. low-risk
ILMN_1680208	LOC284821	Ribosomal protein L13a (Ribosomal protein L13a, isoform CRA_b).	19q13.33	284821	GeneID:284821	13.2455	13.5882	0.342649	4.18423	3.65716e-05	0.00106271	up high- vs. low-risk
ILMN_1762747	RPL15	Ribosomal protein L15	3p24.2	6138	GeneID:6138	11.1382	11.4897	0.35147	4.17294	3.83385e-05	0.00109809	up high- vs. low-risk
ILMN_1694491	CCNG1	Cyclin G1	5q34	900	GeneID:900	7.95381	8.27792	0.324108	4.17105	3.86417e-05	0.00110444	up high- vs. low-risk
ILMN_1786532	CNIH	Cornichon homolog (Drosophila)	14q22.2	10175	GeneID:10175	8.52586	8.95698	0.431118	4.17036	3.8754e-05	0.00110444	up high- vs. low-risk
ILMN_2382829	PRDX2	Peroxiredoxin 2	19p13.13	7001	GeneID:7001	9.16127	9.55339	0.392126	4.17004	3.88056e-05	0.00110444	up high- vs. low-risk
ILMN_1707810	RPS5	Ribosomal protein S5	19q13.43	6193	GeneID:6193	12.8233	13.1668	0.343449	4.16295	3.99687e-05	0.00113038	up high- vs. low-risk
ILMN_1674522	HIGD1A	HIG1 hypoxia inducible domain family, member 1A	3p22.1	25994	GeneID:25994	9.42504	9.80734	0.382305	4.15396	4.14928e-05	0.00116798	up high- vs. low-risk
ILMN_1691611	LOC645436	Homo sapiens similar to Heterogeneous nuclear ribonucleoprotein A1 (Helix-destabilizing protein) (Single-strand binding protein) (hnRNP core protein A1) (HDP-1) (Topoisomerase-inhibitor suppressed), mRNA (cDNA clone IMAGE:2900557), containing frame-shift errors.	17p13.3	645436	GeneID:645436	11.1551	11.517	0.36195	4.10792	5.02041e-05	0.00134982	up high- vs. low-risk
ILMN_1669479	MEST	Mesoderm specific transcript homolog (mouse)	7q32.2	4232	GeneID:4232	5.8905	6.28121	0.390705	4.0883	5.44223e-05	0.00143745	up high- vs. low-risk
ILMN_1746396	CTNNB1	Catenin (cadherin-associated protein), beta 1, 88kDa	3p22.1	1499	GeneID:1499	8.43833	8.83907	0.400744	4.08307	5.56036e-05	0.00145583	up high- vs. low-risk
ILMN_2094166	CHMP5	Chromatin modifying protein 5	9p13.3	51510	GeneID:51510	8.18655	8.59176	0.405208	4.06758	5.92426e-05	0.00153105	up high- vs. low-risk
ILMN_2290808	RPL21	Ribosomal protein L21	13q12.2	6144	GeneID:6144	9.53226	10.0322	0.49995	4.04804	6.41586e-05	0.00162207	up high- vs. low-risk
ILMN_2220739	TMCO3	Transmembrane and coiled-coil domains 3	13q34	55002	GeneID:55002	8.14158	8.50201	0.360429	4.04153	6.58821e-05	0.00165009	up high- vs. low-risk
ILMN_1660832	LOC285053	Ribosomal protein L18a	9p24.1	285053	GeneID:285053	12.1282	12.4791	0.35086	4.02507	7.0435e-05	0.00171438	up high- vs. low-risk
ILMN_1703720	SF3B14	Splicing factor 3B, 14 kDa subunit	2p23.3	51639	GeneID:51639	10.1959	10.5581	0.362238	4.01595	7.30839e-05	0.00176928	up high- vs. low-risk
ILMN_2145250	NACAP1	Nascent-polypeptide-associated complex alpha polypeptide pseudogene 1	8q22.3	83955	GeneID:83955	6.60778	6.94047	0.332692	4.01379	7.37242e-05	0.00177999	up high- vs. low-risk
ILMN_1805922	EBPL	Emopamil binding protein-like	13q14.3	84650	GeneID:84650	8.8957	9.21995	0.324255	4.01143	7.44327e-05	0.00179228	up high- vs. low-risk
ILMN_1736585	TMED10	Transmembrane emp24-like trafficking protein 10 (yeast)	14q24.3	10972	GeneID:10972	7.68875	8.01102	0.322276	3.99856	7.84009e-05	0.00186044	up high- vs. low-risk
ILMN_1700950	LOC646567	OSTCP2 oligosaccharyltransferase complex subunit pseudogene 2	4q25	646567	GeneID:646567	9.16291	9.56928	0.406368	3.98391	8.31621e-05	0.00194266	up high- vs. low-risk
ILMN_1720745	LOC645385	Heterogeneous nuclear ribonucleoprotein A1	6p22.2	645385	GeneID:645385	10.9187	11.2556	0.336953	3.97238	8.71031e-05	0.00200095	up high- vs. low-risk
ILMN_1731546	RPL26	Ribosomal protein L26	17p13.1	6154	GeneID:6154	10.4899	10.9003	0.410436	3.96716	8.89445e-05	0.00203286	up high- vs. low-risk
ILMN_1803799	LOC649555	Similar to hCG1777996	17q21.33	649555	GeneID:649555	6.94989	7.30247	0.35258	3.9664	8.92174e-05	0.00203519	up high- vs. low-risk
ILMN_1676822	C2orf40	chromosome 2 open reading frame 40	2q12.2	84417	GeneID:84417	6.23345	6.87341	0.63996	3.96182	9.0865e-05	0.00205586	up high- vs. low-risk
ILMN_1672605	C7orf41	Chromosome 7 open reading frame 41	7p15.1	222166	GeneID:222166	8.01523	8.46053	0.4453	3.9557	9.31183e-05	0.00209367	up high- vs. low-risk
ILMN_1799015	PXMP2	Peroxisomal membrane protein 2, 22kDa	12q24.33	5827	GeneID:5827	7.74581	8.09786	0.352055	3.93164	0.00010249	0.00224114	up high- vs. low-risk
ILMN_1658911	LOC647349	Adaptor-related protein complex 3, sigma 1 subunit	5q23.1	647349	GeneID:647349	8.314	8.68511	0.371111	3.91723	0.000108525	0.00232861	up high- vs. low-risk
ILMN_1792997	NPTN	Homo sapiens mRNA for stromal cell derived factor receptor 1 isoform b variant protein.	15q24.1	27020	GeneID:27020	7.85769	8.18701	0.329325	3.91687	0.000108682	0.00232861	up high- vs. low-risk
ILMN_1786139	VKORC1	Vitamin K epoxide reductase complex, subunit 1	16p11.2	79001	GeneID:79001	7.66625	8.0279	0.361644	3.91672	0.000108746	0.00232861	up high- vs. low-risk
ILMN_1665035	KRT14	Keratin 14	17q21.2	3861	GeneID:3861	7.12612	7.99897	0.872849	3.89293	0.000119474	0.00251639	up high- vs. low-risk
ILMN_1671800	LOC643911	Homo sapiens PNAS-108 mRNA, partial sequence.	16q12.2	643911	GeneID:643911	6.42934	6.77153	0.342187	3.87922	0.000126103	0.0026162	up high- vs. low-risk
ILMN_1737586	LOC653994	Eukaryotic translation initiation factor 4H	7q11.23	653994	GeneID:653994	7.26799	7.66478	0.396794	3.85282	0.000139859	0.00282342	up high- vs. low-risk
ILMN_1679920	LOC651894	Ribosomal protein S12	2p21	651894	GeneID:651894	8.69998	9.20221	0.502231	3.84818	0.000142422	0.00286232	up high- vs. low-risk
ILMN_1769702	GPAA1	Glycosylphosphatidylinositol anchor attachment protein 1 homolog (yeast)	8q24.3	8733	GeneID:8733	8.54495	8.88444	0.339489	3.82369	0.000156683	0.00307338	up high- vs. low-risk
ILMN_1723884	ARF4	ADP-ribosylation factor 4	3p14.3	378	GeneID:378	8.08977	8.45336	0.363589	3.79479	0.000175255	0.00333934	up high- vs. low-risk
ILMN_1690703	C21orf34	Chromosome 21 open reading frame 34	21q21.1	388815	GeneID:388815	6.98951	7.35393	0.364417	3.78068	0.000185058	0.0034965	up high- vs. low-risk
ILMN_1728787	AGR3	Anterior gradient homolog 3 (Xenopus laevis)	7p21.1	155465	GeneID:155465	5.89337	6.36029	0.466922	3.77926	0.00018607	0.00351194	up high- vs. low-risk
ILMN_1687080	LOC402251	Eukaryotic translation elongation factor 1 alpha 1	7p15.3	402251	GeneID:402251	11.2922	11.7127	0.420574	3.77089	0.000192164	0.00360052	up high- vs. low-risk
ILMN_2413084	HSPA8	Heat shock 70kDa protein 8	11q24.1	3312	GeneID:3312	11.6676	12.0272	0.359538	3.76061	0.000199902	0.00369545	up high- vs. low-risk
ILMN_1729180	GATM	Glycine amidinotransferase (L-arginine:glycine amidinotransferase)	15q21.1	2628	GeneID:2628	6.57231	6.93987	0.367568	3.74852	0.000209374	0.00380685	up high- vs. low-risk
ILMN_1778803	ZFAND6	Zinc finger, AN1-type domain 6	15q25.1	54469	GeneID:54469	7.65762	7.99061	0.332987	3.74833	0.000209526	0.00380685	up high- vs. low-risk
ILMN_1808789	MYO5C	Myosin VC	15q21.2	55930	GeneID:55930	8.11814	8.47194	0.353806	3.71491	0.000237984	0.00421623	up high- vs. low-risk
ILMN_1701753	LOC644063	Heterogeneous nuclear ribonucleoprotein K	9q21.32	644063	GeneID:644063	8.52763	8.96074	0.433105	3.70661	0.000245606	0.00431844	up high- vs. low-risk
ILMN_1662795	CA2	Carbonic anhydrase II	8q21.2	760	GeneID:760	7.91482	8.42308	0.508261	3.70299	0.000248993	0.00436518	up high- vs. low-risk
ILMN_1743065	PTPLAD1	Protein tyrosine phosphatase-like A domain containing 1	15q22.31	51495	GeneID:51495	8.93924	9.28333	0.344088	3.67821	0.000273421	0.00466775	up high- vs. low-risk
ILMN_1703337	LOC441763		16p11.2	441763	GeneID:441763	6.91044	7.29251	0.382064	3.65697	0.00029615	0.00492776	up high- vs. low-risk
ILMN_1676765	LOC390354	RPL18AP3 ribosomal protein L18a pseudogene 3	19p13.11	390354	GeneID:390354	11.5455	11.9229	0.37736	3.64663	0.000307843	0.00507551	up high- vs. low-risk
ILMN_1695423	CD9	CD9 molecule	12p13.31	928	GeneID:928	8.31316	8.69247	0.379315	3.64662	0.000307851	0.00507551	up high- vs. low-risk
ILMN_1748427	ZNF239	Zinc finger protein 239	10q11.21	8187	GeneID:8187	7.42169	7.75689	0.335194	3.61674	0.000344127	0.00552291	up high- vs. low-risk
ILMN_1658835	CAV2	Caveolin 2	7q31.2	858	GeneID:858	7.60427	7.95208	0.347815	3.6021	0.000363337	0.00576314	up high- vs. low-risk
ILMN_1708130	EHF	Ets homologous factor	11p13	26298	GeneID:26298	6.91006	7.38879	0.478733	3.59968	0.000366598	0.00579953	up high- vs. low-risk
ILMN_1721659	LOC643668	Proteasome (prosome, macropain) 26S subunit, ATPase, 1	14q32.11	643668	GeneID:643668	8.93571	9.26843	0.332714	3.58986	0.000380156	0.0059564	up high- vs. low-risk
ILMN_1802615	CDK6	Cyclin-dependent kinase 6	7q21.2	1021	GeneID:1021	8.21834	8.66882	0.450475	3.58174	0.000391723	0.00608462	up high- vs. low-risk
ILMN_2316173	AP1S1	Adaptor-related protein complex 1, sigma 1 subunit	7q22.1	1174	GeneID:1174	8.0286	8.384	0.355398	3.57544	0.000400914	0.00618466	up high- vs. low-risk
ILMN_1654441	OAT	Ornithine aminotransferase (gyrate atrophy)	10q26.13	4942	GeneID:4942	9.56435	9.93623	0.37188	3.57426	0.000402666	0.00620104	up high- vs. low-risk
ILMN_1679025	LOC641848	Ribosomal protein S3A	7q21.3	641848	GeneID:641848	7.3004	7.64561	0.345208	3.5718	0.00040633	0.00622871	up high- vs. low-risk
ILMN_1726574	CACYBP	Calcyclin binding protein	1q25.1	27101	GeneID:27101	8.41412	8.76726	0.353148	3.53898	0.000458252	0.0068234	up high- vs. low-risk
ILMN_1714820	ITGB1	Integrin, beta 1 (fibronectin receptor, beta polypeptide, antigen CD29 includes MDF2, MSK12)	10p11.22	3688	GeneID:3688	9.41136	9.77463	0.363271	3.51912	0.000492632	0.00718076	up high- vs. low-risk
ILMN_1736670	PPP1R3C	Protein phosphatase 1, regulatory (inhibitor) subunit 3C	10q23.32	5507	GeneID:5507	6.73187	7.13348	0.401615	3.51078	0.000507778	0.00735975	up high- vs. low-risk
ILMN_2404065	APP	Amyloid beta (A4) precursor protein	21q21.3	351	GeneID:351	10.4316	10.8926	0.460917	3.4929	0.000541728	0.00771509	up high- vs. low-risk
ILMN_1665736	LOC648024	Eukaryotic translation initiation factor 4A, isoform 1	17p13.1	648024	GeneID:648024	9.01995	9.38498	0.365025	3.48739	0.000552621	0.00782684	up high- vs. low-risk
ILMN_1729112	CHPT1	Choline phosphotransferase 1	12q23.2	56994	GeneID:56994	8.19973	8.59678	0.397055	3.47411	0.00057969	0.00810807	up high- vs. low-risk
ILMN_1719611	CCT6A	Chaperonin containing TCP1, subunit 6A (zeta 1)	7p11.2	908	GeneID:908	7.81009	8.15982	0.349728	3.46412	0.000600889	0.00827479	up high- vs. low-risk
ILMN_1737604	FLJ10986	FGGY carbohydrate kinase domain containing	1p32.1	55277	GeneID:55277	7.65851	8.02262	0.364107	3.44025	0.000654462	0.00877167	up high- vs. low-risk
ILMN_1665235	CRTAP	Cartilage associated protein	3p22.3	10491	GeneID:10491	7.88136	8.26791	0.386551	3.4376	0.000660668	0.00882224	up high- vs. low-risk
ILMN_1792689	HIST1H2AC	Histone cluster 1, H2ac	6p22.1	8334	GeneID:8334	8.28377	8.71589	0.432114	3.42624	0.000687942	0.00907195	up high- vs. low-risk
ILMN_1716014	LOC653232	Ribosomal protein L15	3p24.2	653232	GeneID:653232	9.56735	9.93129	0.363934	3.40411	0.000744117	0.00954677	up high- vs. low-risk
ILMN_1764573	XIST	X (inactive)-specific transcript (non-protein coding)	Xq13.2	7503	GeneID:7503	7.76015	7.41571	-0.344436	-3.38756	0.000788897	0.00998994	down high- vs. low-risk
ILMN_2083066	IGLL3	Immunoglobulin lambda-like polypeptide 3	22q11.23	91353	GeneID:91353	7.63894	6.9771	-0.66184	-3.38883	0.000785376	0.00996242	down high- vs. low-risk
ILMN_1774287	CFB	complement factor B	6p21.32	629	GeneID:629	9.26138	8.64286	-0.618515	-3.40862	0.000732331	0.0094125	down high- vs. low-risk
ILMN_2103107	ADAMDEC1	ADAM-like, decysin 1	8p21.2	27299	GeneID:27299	7.83388	7.31886	-0.515021	-3.40966	0.000729649	0.00939315	down high- vs. low-risk
ILMN_2208903	CD52	CD52 molecule	1p36.11	1043	GeneID:1043	9.35492	8.71164	-0.643272	-3.41571	0.000714166	0.00925492	down high- vs. low-risk
ILMN_2057479	EGFL6	EGF-like-domain, multiple 6	Xp22.2	25975	GeneID:25975	7.28603	6.85367	-0.432365	-3.41813	0.00070805	0.00922414	down high- vs. low-risk
ILMN_1754894	C1orf162	Chromosome 1 open reading frame 162	1p13.2	128346	GeneID:128346	9.62838	9.26756	-0.360814	-3.42192	0.00069859	0.00915564	down high- vs. low-risk
ILMN_1737918	C1QA	Complement component 1, q subcomponent, A chain	1p36.12	712	GeneID:712	7.92991	7.55485	-0.375057	-3.42687	0.000686399	0.00906489	down high- vs. low-risk
ILMN_1697309	NCF1	Neutrophil cytosolic factor 1	7q11.23	653361	GeneID:653361	6.61939	6.29063	-0.328753	-3.44156	0.000651405	0.00875705	down high- vs. low-risk
ILMN_2412214	LGALS9	Lectin, galactoside-binding, soluble, 9	17q11.1	3965	GeneID:3965	7.57985	7.24911	-0.330736	-3.44816	0.000636219	0.00860435	down high- vs. low-risk
ILMN_1796409	C1QB	Complement component 1, q subcomponent, B chain	1p36.12	713	GeneID:713	11.1233	10.6757	-0.447529	-3.44967	0.000632791	0.00859029	down high- vs. low-risk
ILMN_2085862	SLC15A3	Homo sapiens mRNA for peptide transporter 3, complete cds.	11q12.2	51296	GeneID:51296	9.99805	9.63851	-0.359546	-3.45685	0.000616744	0.0084297	down high- vs. low-risk
ILMN_1763452	EVI2B	Ecotropic viral integration site 2B	17q11.2	2124	GeneID:2124	8.14678	7.7088	-0.437971	-3.45842	0.000613298	0.00839537	down high- vs. low-risk
ILMN_1707448	CRKRS	Cdc2-related kinase, arginine/serine-rich	17q12	51755	GeneID:51755	7.82414	7.41152	-0.412627	-3.47604	0.000575678	0.0080645	down high- vs. low-risk
ILMN_1653498	IGSF6	Immunoglobulin superfamily, member 6	16p12.2	10261	GeneID:10261	7.44612	7.08838	-0.357737	-3.49634	0.000535039	0.00763407	down high- vs. low-risk
ILMN_1727689	TNFAIP2	Tumor necrosis factor, alpha-induced protein 2	14q32.32	7127	GeneID:7127	7.26288	6.93241	-0.330462	-3.50139	0.000525353	0.00752958	down high- vs. low-risk
ILMN_2208413	ARHGAP15	Rho GTPase activating protein 15	2q22.2	55843	GeneID:55843	8.10389	7.71232	-0.39157	-3.50172	0.000524735	0.00752671	down high- vs. low-risk
ILMN_1787509	PRIC285	Peroxisomal proliferator-activated receptor A interacting complex 285	20q13.33	85441	GeneID:85441	8.8044	8.46305	-0.341356	-3.50208	0.000524055	0.00752296	down high- vs. low-risk
ILMN_2132599	ANKRD22	Ankyrin repeat domain 22	10q23.31	118932	GeneID:118932	6.97635	6.63644	-0.339913	-3.50973	0.000509718	0.00737009	down high- vs. low-risk
ILMN_1798256	UPP1	Uridine phosphorylase 1	7p12.3	7378	GeneID:7378	8.84698	8.5212	-0.325781	-3.51047	0.000508352	0.00735975	down high- vs. low-risk
ILMN_1785902	C1QC	Complement component 1, q subcomponent, C chain	1p36.12	714	GeneID:714	10.5596	10.1473	-0.412256	-3.51706	0.000496335	0.00722304	down high- vs. low-risk
ILMN_2148785	GBP1	Guanylate binding protein 1, interferon-inducible, 67kDa	1p22.2	2633	GeneID:2633	8.92739	8.46446	-0.462934	-3.52802	0.000476939	0.00701514	down high- vs. low-risk
ILMN_1778723	AMICA1	Adhesion molecule, interacts with CXADR antigen 1	11q23.3	120425	GeneID:120425	7.30376	6.94609	-0.357667	-3.5378	0.00046024	0.00683039	down high- vs. low-risk
ILMN_2307903	VCAM1	Vascular cell adhesion molecule 1	1p21.2	7412	GeneID:7412	9.64526	9.18277	-0.462487	-3.5467	0.000445512	0.00667793	down high- vs. low-risk
ILMN_2130441	HLA-H	Major histocompatibility complex, class I, H (pseudogene)	6_qbl_hap2	3136	GeneID:3136	12.3353	11.9249	-0.410361	-3.54817	0.000443124	0.00665878	down high- vs. low-risk
ILMN_1796316	MMP9	Matrix metallopeptidase 9 (gelatinase B, 92kDa gelatinase, 92kDa type IV collagenase)	20q13.12	4318	GeneID:4318	10.2697	9.62702	-0.64272	-3.58462	0.000387587	0.00603602	down high- vs. low-risk
ILMN_1674811	OASL	2'-5'-oligoadenylate synthetase-like	12q24.31	8638	GeneID:8638	7.23026	6.80426	-0.425993	-3.5849	0.000387182	0.00603494	down high- vs. low-risk
ILMN_1713751	ADAM19	ADAM metallopeptidase domain 19 (meltrin beta)	5q33.3	8728	GeneID:8728	8.36215	8.0382	-0.323957	-3.59757	0.000369474	0.00582965	down high- vs. low-risk
ILMN_1693826	HAVCR2	Hepatitis A virus cellular receptor 2	5q33.3	84868	GeneID:84868	9.45653	9.1047	-0.351825	-3.60051	0.000365473	0.00578683	down high- vs. low-risk
ILMN_1810275	SLC7A7	Solute carrier family 7 (cationic amino acid transporter, y+ system), member 7	14q11.2	9056	GeneID:9056	8.95674	8.58064	-0.376099	-3.60438	0.000360273	0.00571959	down high- vs. low-risk
ILMN_1795762	PLEK	Pleckstrin	2p14	5341	GeneID:5341	8.71708	8.26652	-0.450563	-3.61506	0.000346285	0.00555141	down high- vs. low-risk
ILMN_1655077	PRDM1	PR domain containing 1, with ZNF domain	6q21	639	GeneID:639	7.92707	7.59863	-0.32844	-3.64682	0.000307621	0.00507551	down high- vs. low-risk
ILMN_2404049	RBM38	RNA binding motif protein 38	20q13.31	55544	GeneID:55544	6.95876	6.61971	-0.339046	-3.65019	0.00030377	0.00503128	down high- vs. low-risk
ILMN_1666594	IRF8	Interferon regulatory factor 8	16q24.1	3394	GeneID:3394	8.95617	8.45857	-0.497594	-3.67139	0.000280531	0.0047469	down high- vs. low-risk
ILMN_2355953	LILRB4	Leukocyte immunoglobulin-like receptor, subfamily B (with TM and ITIM domains), member 4	19q13.42	11006	GeneID:11006	7.28738	6.91332	-0.37406	-3.68195	0.000269596	0.00461396	down high- vs. low-risk
ILMN_1710734	GZMK	Granzyme K (granzyme 3; tryptase II)	5q11.2	3003	GeneID:3003	8.07116	7.44066	-0.630509	-3.68257	0.000268972	0.00461396	down high- vs. low-risk
ILMN_2186806	HLA-F	Major histocompatibility complex, class I, B	6_cox_hap1	3134	GeneID:3134	10.2296	9.75107	-0.478574	-3.69754	0.00025418	0.00441789	down high- vs. low-risk
ILMN_1723412	ASCL2	Achaete-scute complex homolog 2 (Drosophila)	11p15.5	430	GeneID:430	7.87518	7.4418	-0.433376	-3.69904	0.000252742	0.00440516	down high- vs. low-risk
ILMN_2185845	BRSK1	BR serine/threonine kinase 1	19q13.42	84446	GeneID:84446	8.17316	7.8478	-0.325356	-3.70195	0.000249972	0.00437309	down high- vs. low-risk
ILMN_1799725	DOCK2	Dedicator of cytokinesis 2	5q35.1	1794	GeneID:1794	8.73135	8.31437	-0.416986	-3.71426	0.000238577	0.00421959	down high- vs. low-risk
ILMN_1731922	LOC644931		17p11.2	644931	GeneID:644931	7.83402	7.49821	-0.335809	-3.7168	0.000236284	0.0041997	down high- vs. low-risk
ILMN_1804339	CAMK1G	Calcium/calmodulin-dependent protein kinase IG	1q32.2	57172	GeneID:57172	6.94235	6.42148	-0.520863	-3.73175	0.000223217	0.00399507	down high- vs. low-risk
ILMN_1761733	HLA-DMB	Major histocompatibility complex, class II, DM beta	6_cox_hap1	3109	GeneID:3109	11.1935	10.7803	-0.413215	-3.75707	0.00020263	0.00372401	down high- vs. low-risk
ILMN_1670305	SERPING1	Serpin peptidase inhibitor, clade G (C1 inhibitor), member 1	11q12.1	710	GeneID:710	9.49501	9.12015	-0.374863	-3.75924	0.000200951	0.00370722	down high- vs. low-risk
ILMN_1656868	LOC23117	Nuclear pore complex interacting protein-like 3	16p12.2	23117	GeneID:23117	11.5274	11.147	-0.380398	-3.77542	0.000188843	0.00355309	down high- vs. low-risk
ILMN_1702301	DOCK10	Dedicator of cytokinesis 10	2q36.2	55619	GeneID:55619	8.07415	7.73925	-0.334896	-3.79132	0.000177616	0.00337361	down high- vs. low-risk
ILMN_1781155	LYN	V-yes-1 Yamaguchi sarcoma viral related oncogene homolog	8q12.1	4067	GeneID:4067	9.753	9.3937	-0.359299	-3.8037	0.000169319	0.00325212	down high- vs. low-risk
ILMN_1669657	LOC440345	NPIPB4 nuclear pore complex interacting protein family member B4	16p12.2	440345	GeneID:440345	7.88188	7.51808	-0.363799	-3.81075	0.000164754	0.0031831	down high- vs. low-risk
ILMN_1665761	BCL11B	B-cell CLL/lymphoma 11B (zinc finger protein)	14q32.2	64919	GeneID:64919	7.11515	6.68902	-0.426126	-3.81184	0.000164059	0.00317307	down high- vs. low-risk
ILMN_1659075	HLA-DOA	Major histocompatibility complex, class II, DO alpha	6p21.32	3111	GeneID:3111	8.39889	7.95911	-0.439773	-3.82328	0.000156934	0.00307495	down high- vs. low-risk
ILMN_1799467	SAMD9L	Sterile alpha motif domain containing 9-like	7q21.2	219285	GeneID:219285	7.76718	7.38084	-0.386338	-3.83614	0.000149272	0.00295703	down high- vs. low-risk
ILMN_1742789	LPXN	Leupaxin	11q12.1	9404	GeneID:9404	9.51365	9.10759	-0.406064	-3.84248	0.000145625	0.00290653	down high- vs. low-risk
ILMN_1685625	UCP2	Uncoupling protein 2 (mitochondrial, proton carrier)	11q13.4	7351	GeneID:7351	8.94798	8.47087	-0.47711	-3.85147	0.000140601	0.00282887	down high- vs. low-risk
ILMN_1691341	IL7R	Interleukin 7 receptor	5p13.2	3575	GeneID:3575	8.15491	7.58294	-0.571969	-3.8519	0.000140366	0.00282732	down high- vs. low-risk
ILMN_1748473	GIMAP4	GTPase, IMAP family member 4	7q36.1	55303	GeneID:55303	9.71063	9.25993	-0.450704	-3.86458	0.000133564	0.00272694	down high- vs. low-risk
ILMN_1758418	TNFSF13B	Tumor necrosis factor (ligand) superfamily, member 13b	13q33.3	10673	GeneID:10673	8.78131	8.29216	-0.489148	-3.87603	0.000127696	0.00263404	down high- vs. low-risk
ILMN_1801710	APBB1IP	Amyloid beta (A4) precursor protein-binding, family B, member 1 interacting protein	10p12.1	54518	GeneID:54518	8.28223	7.91276	-0.36947	-3.88561	0.00012297	0.00256005	down high- vs. low-risk
ILMN_1747305	GIMAP8	GTPase, IMAP family member 8	7q36.1	155038	GeneID:155038	7.72687	7.39467	-0.332205	-3.89142	0.000120188	0.00252507	down high- vs. low-risk
ILMN_2212763	ICAM3	Intercellular adhesion molecule 3	19p13.2	3385	GeneID:3385	8.64476	8.28062	-0.364142	-3.89399	0.000118975	0.00251176	down high- vs. low-risk
ILMN_1776678	GIMAP7	GTPase, IMAP family member 7	7q36.1	168537	GeneID:168537	8.5368	8.02521	-0.511596	-3.89529	0.000118364	0.0025018	down high- vs. low-risk
ILMN_1714602	CD86	CD86 molecule	3q13.33	942	GeneID:942	8.32455	7.94811	-0.376435	-3.89567	0.000118188	0.00250102	down high- vs. low-risk
ILMN_2368318	FGR	Gardner-Rasheed feline sarcoma viral (v-fgr) oncogene homolog	1p35.3	2268	GeneID:2268	7.96351	7.54433	-0.419181	-3.91283	0.000110436	0.00235638	down high- vs. low-risk
ILMN_1744604	CYBA	Cytochrome b-245, alpha polypeptide	16q24.3	1535	GeneID:1535	11.1433	10.7541	-0.389209	-3.93054	0.000102942	0.00224467	down high- vs. low-risk
ILMN_2364022	SLC16A3	Solute carrier family 16, member 3 (monocarboxylic acid transporter 4)	17q25.3	9123	GeneID:9123	9.68077	9.2229	-0.457875	-3.93765	0.000100069	0.00220698	down high- vs. low-risk
ILMN_1711617	GMFG	Glia maturation factor, gamma	19q13.2	9535	GeneID:9535	8.41953	7.99136	-0.42817	-3.93977	9.92295e-05	0.0021954	down high- vs. low-risk
ILMN_1674063	OAS2	2'-5'-oligoadenylate synthetase 2, 69/71kDa	12q24.13	4939	GeneID:4939	10.0286	9.49108	-0.53747	-3.94014	9.90818e-05	0.00219483	down high- vs. low-risk
ILMN_1676528	BTN3A2	Butyrophilin, subfamily 3, member A2	6p22.1	11118	GeneID:11118	7.7547	7.37861	-0.376094	-3.95985	9.15851e-05	0.00206955	down high- vs. low-risk
ILMN_1678841	UBD	Ubiquitin D	6_qbl_hap2	10537	GeneID:10537	9.43427	8.52699	-0.907285	-3.97111	8.75486e-05	0.00200605	down high- vs. low-risk
ILMN_1775542	FAIM3	Fas apoptotic inhibitory molecule 3	1q32.1	9214	GeneID:9214	7.70302	7.12859	-0.574438	-3.98981	8.12142e-05	0.0019021	down high- vs. low-risk
ILMN_2047511	CENTA1	ArfGAP with dual PH domains 1	7p22.3	11033	GeneID:11033	8.41183	7.98684	-0.424988	-3.99525	7.94549e-05	0.00187064	down high- vs. low-risk
ILMN_1705750	TGM2	Transglutaminase 2 (C polypeptide, protein-glutamine-gamma-glutamyltransferase)	20q11.23	7052	GeneID:7052	8.32281	7.90268	-0.420133	-4.00987	7.49017e-05	0.00180116	down high- vs. low-risk
ILMN_2061043	CD48	CD48 molecule	1q23.3	962	GeneID:962	7.74929	7.20525	-0.544032	-4.01596	7.30797e-05	0.00176928	down high- vs. low-risk
ILMN_1772189	ABCD1	ATP-binding cassette, sub-family D (ALD), member 1	Xq28	215	GeneID:215	6.98189	6.65094	-0.330945	-4.02918	6.92705e-05	0.00169521	down high- vs. low-risk
ILMN_2070052	LOC613037	nuclear pore complex interacting protein family, member B13	16p11.2	613037	GeneID:613037	11.0781	10.6827	-0.395353	-4.03506	6.76354e-05	0.00167325	down high- vs. low-risk
ILMN_1776181	BIRC3	Baculoviral IAP repeat-containing 3	11q22.2	330	GeneID:330	8.32538	7.79923	-0.526148	-4.04124	6.59589e-05	0.00165009	down high- vs. low-risk
ILMN_1751400	SKAP1	Src kinase associated phosphoprotein 1	17q21.32	8631	GeneID:8631	7.52332	7.08346	-0.439862	-4.05671	6.1932e-05	0.00158461	down high- vs. low-risk
ILMN_1700147	VPREB3	V-set pre-B cell surrogate light chain 3	22q11.23	29802	GeneID:29802	6.61747	6.10745	-0.510026	-4.06068	6.09379e-05	0.00156363	down high- vs. low-risk
ILMN_2413808	CD53	CD53 molecule	1p13.3	963	GeneID:963	7.24312	6.84893	-0.394193	-4.06077	6.09138e-05	0.00156363	down high- vs. low-risk
ILMN_1713266	FAM46C	Family with sequence similarity 46, member C	1p12	54855	GeneID:54855	8.74337	8.02862	-0.714745	-4.06655	5.94922e-05	0.00153529	down high- vs. low-risk
ILMN_1779324	GZMA	granzyme A	5q11.2	3001	GeneID:3001	7.76743	7.20171	-0.565721	-4.0834	5.55287e-05	0.00145583	down high- vs. low-risk
ILMN_1777565	TAP2	Transporter 2, ATP-binding cassette, sub-family B (MDR/TAP)	6_cox_hap1	6891	GeneID:6891	7.63461	7.27074	-0.363879	-4.09579	5.2774e-05	0.00140215	down high- vs. low-risk
ILMN_1796537	FYB	FYN binding protein (FYB-120/130)	5p13.1	2533	GeneID:2533	8.15902	7.67926	-0.47976	-4.10993	4.979e-05	0.00134069	down high- vs. low-risk
ILMN_2368530	IL32	Interleukin 32	16p13.3	9235	GeneID:9235	8.33273	7.84799	-0.484738	-4.14698	4.27133e-05	0.00119485	down high- vs. low-risk
ILMN_1695311	HLA-DMA	Major histocompatibility complex, class II, DM alpha	6_cox_hap1	3108	GeneID:3108	11.4323	10.9965	-0.435775	-4.15109	4.19908e-05	0.00117831	down high- vs. low-risk
ILMN_1655549	SIGLEC10	Sialic acid binding Ig-like lectin 10	19q13.33	89790	GeneID:89790	7.16116	6.77176	-0.389402	-4.17751	3.76143e-05	0.00107907	down high- vs. low-risk
ILMN_1778321	SLC2A6	Solute carrier family 2 (facilitated glucose transporter), member 6	9q34.2	11182	GeneID:11182	7.39636	7.01283	-0.38353	-4.18973	3.57402e-05	0.0010419	down high- vs. low-risk
ILMN_1659688	LGALS3BP	Lectin, galactoside-binding, soluble, 3 binding protein	17q25.3	3959	GeneID:3959	9.4001	8.8892	-0.510905	-4.18978	3.57326e-05	0.0010419	down high- vs. low-risk
ILMN_2348268	IFFO1	Intermediate filament family orphan 1	12p13.31	25900	GeneID:25900	8.23008	7.86897	-0.361115	-4.19203	3.53975e-05	0.00103697	down high- vs. low-risk
ILMN_1748283	PIM2	Pim-2 oncogene	Xp11.23	11040	GeneID:11040	8.3951	7.84083	-0.554269	-4.19729	3.46251e-05	0.00101933	down high- vs. low-risk
ILMN_1782729	CLECL1	C-type lectin-like 1	12p13.31	160365	GeneID:160365	6.47068	6.10345	-0.367234	-4.20446	3.35991e-05	0.00099564	down high- vs. low-risk
ILMN_1804419	LRMP	Lymphoid-restricted membrane protein	12p12.1	4033	GeneID:4033	6.65634	6.26671	-0.389625	-4.20908	3.29531e-05	0.000981348	down high- vs. low-risk
ILMN_1769520	UBE2L6	Ubiquitin-conjugating enzyme E2L 6	11q12.1	9246	GeneID:9246	10.9964	10.5798	-0.416589	-4.21672	3.19122e-05	0.000961492	down high- vs. low-risk
ILMN_1666206	GSDMB	Gasdermin B	17q12	55876	GeneID:55876	7.93618	7.57782	-0.358365	-4.22435	3.09022e-05	0.00093419	down high- vs. low-risk
ILMN_1662799	GPSM3	G-protein signaling modulator 3 (AGS3-like, C. elegans)	6_cox_hap1	63940	GeneID:63940	7.42489	7.02597	-0.398926	-4.22909	3.02905e-05	0.000923259	down high- vs. low-risk
ILMN_1688959	CD27	CD27 molecule	12p13.31	939	GeneID:939	7.00233	6.53794	-0.464383	-4.23058	3.01012e-05	0.000920809	down high- vs. low-risk
ILMN_1774077	GBP2	Guanylate binding protein 2, interferon-inducible	1p22.2	2634	GeneID:2634	10.639	10.1552	-0.483761	-4.25144	2.75597e-05	0.000859137	down high- vs. low-risk
ILMN_1749403	TSPAN33	Tetraspanin 33	7q32.1	340348	GeneID:340348	8.12656	7.76978	-0.356781	-4.26442	2.60837e-05	0.000824555	down high- vs. low-risk
ILMN_1811049	POU2AF1	POU class 2 associating factor 1	11q23.1	5450	GeneID:5450	6.5309	6.05659	-0.474313	-4.26658	2.58452e-05	0.000820889	down high- vs. low-risk
ILMN_1709683	RASSF2	Ras association (RalGDS/AF-6) domain family member 2	20p13	9770	GeneID:9770	9.16258	8.75107	-0.411509	-4.27085	2.538e-05	0.000810862	down high- vs. low-risk
ILMN_1734878	CD79A	CD79a molecule, immunoglobulin-associated alpha	19q13.2	973	GeneID:973	8.04862	7.21644	-0.832186	-4.28217	2.41861e-05	0.000788117	down high- vs. low-risk
ILMN_1736567	CD74	CD74 molecule, major histocompatibility complex, class II invariant chain	5q33.1	972	GeneID:972	12.5876	12.1529	-0.434693	-4.28345	2.4054e-05	0.000786662	down high- vs. low-risk
ILMN_1759075	TNFRSF13B	Tumor necrosis factor receptor superfamily, member 13B	17p11.2	23495	GeneID:23495	6.14816	5.75284	-0.395318	-4.29967	2.24455e-05	0.000742154	down high- vs. low-risk
ILMN_1660364	PSCD4	Cytohesin 4	22q13.1	27128	GeneID:27128	8.1656	7.74036	-0.425242	-4.31283	2.12152e-05	0.000710619	down high- vs. low-risk
ILMN_1764577	MFNG	MFNG O-fucosylpeptide 3-beta-N-acetylglucosaminyltransferase	22q13.1	4242	GeneID:4242	7.71636	7.3096	-0.40676	-4.3138	2.11277e-05	0.000710332	down high- vs. low-risk
ILMN_1775734	SH2D3C	SH2 domain containing 3C	9q34.11	10044	GeneID:10044	7.46583	7.11344	-0.352391	-4.32404	2.02195e-05	0.00068363	down high- vs. low-risk
ILMN_2081682	SMAP2	Small ArfGAP2	1p34.2	64744	GeneID:64744	9.75353	9.391	-0.362534	-4.32419	2.0206e-05	0.00068363	down high- vs. low-risk
ILMN_1652825	IL10RA	Interleukin 10 receptor, alpha	11q23.3	3587	GeneID:3587	7.45078	7.03478	-0.415998	-4.32686	1.99759e-05	0.000679224	down high- vs. low-risk
ILMN_2319913	DGKA	Diacylglycerol kinase, alpha 80kDa	12q13.2	1606	GeneID:1606	6.93433	6.59329	-0.341046	-4.34345	1.85991e-05	0.000644957	down high- vs. low-risk
ILMN_1659960	IL4I1	Nucleoporin 62kDa	19q13.33	259307	GeneID:259307	6.73736	6.35462	-0.382741	-4.34489	1.84842e-05	0.000644957	down high- vs. low-risk
ILMN_2109708	ECGF1	Thymidine phosphorylase	22q13.33	1890	GeneID:1890	11.7892	11.3713	-0.417888	-4.36072	1.72628e-05	0.000621471	down high- vs. low-risk
ILMN_2254635	ITGAX	Integrin, alpha X (complement component 3 receptor 4 subunit)	16p11.2	3687	GeneID:3687	7.731	7.29417	-0.436824	-4.36156	1.72e-05	0.000621244	down high- vs. low-risk
ILMN_2264011	GRAP	GRB2-related adaptor protein	17p11.2	10750	GeneID:10750	7.61393	7.22532	-0.388606	-4.37086	1.65214e-05	0.000601568	down high- vs. low-risk
ILMN_1800787	RFTN1	Raftlin, lipid raft linker 1	3p24.3	23180	GeneID:23180	9.58063	9.1786	-0.402029	-4.38385	1.56163e-05	0.000575599	down high- vs. low-risk
ILMN_2233783	CD38	CD38 molecule	4p15.32	952	GeneID:952	6.88781	6.32637	-0.561443	-4.38419	1.55934e-05	0.000575599	down high- vs. low-risk
ILMN_1662932	LCP1	Lymphocyte cytosolic protein 1 (L-plastin)	13q14.12	3936	GeneID:3936	11.087	10.5483	-0.538721	-4.38934	1.52482e-05	0.000566677	down high- vs. low-risk
ILMN_1659913	ISG20	Interferon stimulated exonuclease gene 20kDa	15q26.1	3669	GeneID:3669	9.77354	9.24315	-0.530389	-4.39157	1.51011e-05	0.000564329	down high- vs. low-risk
ILMN_1656287	SPOCK2	Sparc/osteonectin, cwcv and kazal-like domains proteoglycan (testican) 2	10q22.1	9806	GeneID:9806	9.10559	8.41097	-0.694621	-4.39759	1.47101e-05	0.000552386	down high- vs. low-risk
ILMN_1786176	CD37	CD37 molecule	19q13.33	951	GeneID:951	7.48592	6.91337	-0.572548	-4.3995	1.45888e-05	0.000552386	down high- vs. low-risk
ILMN_1656310	INDO	Indoleamine 2,3-dioxygenase 1	8p11.21	3620	GeneID:3620	7.36021	6.70711	-0.653094	-4.40603	1.4179e-05	0.000541489	down high- vs. low-risk
ILMN_2255579	RAB37	RAB37, member RAS oncogene family	17q25.1	326624	GeneID:326624	6.21802	5.86936	-0.348668	-4.40969	1.39543e-05	0.000536323	down high- vs. low-risk
ILMN_1802106	APOBEC3G	Apolipoprotein B mRNA editing enzyme, catalytic polypeptide-like 3G	22q13.1	60489	GeneID:60489	7.45258	6.97538	-0.477199	-4.41235	1.37933e-05	0.000532409	down high- vs. low-risk
ILMN_1758672	FAM107B	Family with sequence similarity 107, member B	10p13	83641	GeneID:83641	8.88607	8.48974	-0.396337	-4.41805	1.34541e-05	0.000522682	down high- vs. low-risk
ILMN_1815719	PLCG2	Phospholipase C, gamma 2 (phosphatidylinositol-specific)	16q23.3	5336	GeneID:5336	9.05071	8.54559	-0.505125	-4.41854	1.34255e-05	0.000522682	down high- vs. low-risk
ILMN_2049536	TRPV2	Transient receptor potential cation channel, subfamily V, member 2	17p11.2	51393	GeneID:51393	7.40271	7.0016	-0.401117	-4.42486	1.30592e-05	0.000516614	down high- vs. low-risk
ILMN_1702787	SEMA4A	Sema domain, immunoglobulin domain (Ig), transmembrane domain (TM) and short cytoplasmic domain, (semaphorin) 4A	1q22	64218	GeneID:64218	8.30649	7.96186	-0.344628	-4.44607	1.18996e-05	0.000481401	down high- vs. low-risk
ILMN_1742618	XAF1	XIAP associated factor 1	17p13.2	54739	GeneID:54739	9.00936	8.49287	-0.516488	-4.45103	1.16432e-05	0.000473818	down high- vs. low-risk
ILMN_1788931	DOCK8	Dedicator of cytokinesis 8	9p24.3	81704	GeneID:81704	7.28107	6.89434	-0.386723	-4.45198	1.15947e-05	0.000472918	down high- vs. low-risk
ILMN_1699931	HCST	Hematopoietic cell signal transducer	19q13.12	10870	GeneID:10870	10.2563	9.66405	-0.592215	-4.45792	1.12955e-05	0.000463869	down high- vs. low-risk
ILMN_1724422	SELL	Selectin L	1q24.2	6402	GeneID:6402	6.93783	6.34526	-0.592563	-4.45924	1.12302e-05	0.000462242	down high- vs. low-risk
ILMN_2216582	LYL1	Lymphoblastic leukemia derived sequence 1	19p13.13	4066	GeneID:4066	8.55889	8.13687	-0.422014	-4.46986	1.07167e-05	0.000445179	down high- vs. low-risk
ILMN_2115005	FGD2	FYVE, RhoGEF and PH domain containing 2	6p21.2	221472	GeneID:221472	8.20838	7.75817	-0.450205	-4.47428	1.05093e-05	0.000439051	down high- vs. low-risk
ILMN_1780368	GPR18	G protein-coupled receptor 18	13q32.3	2841	GeneID:2841	6.14562	5.77686	-0.368756	-4.4784	1.032e-05	0.000433708	down high- vs. low-risk
ILMN_1769782	LAX1	Lymphocyte transmembrane adaptor 1	1q32.1	54900	GeneID:54900	6.63109	6.16902	-0.462069	-4.48461	1.00406e-05	0.000424945	down high- vs. low-risk
ILMN_1798181	IRF7	Interferon regulatory factor 7	11p15.5	3665	GeneID:3665	9.00996	8.54686	-0.463098	-4.48813	9.88518e-06	0.000419355	down high- vs. low-risk
ILMN_1713496	ST3GAL5	ST3 beta-galactoside alpha-2,3-sialyltransferase 5	2p11.2	8869	GeneID:8869	7.56762	7.19055	-0.377071	-4.49048	9.78282e-06	0.000415994	down high- vs. low-risk
ILMN_2206722	FER1L4	Fer-1-like 4 (C. elegans)	20q11.22	80307	GeneID:80307	6.83479	6.38587	-0.448914	-4.49896	9.42222e-06	0.000403522	down high- vs. low-risk
ILMN_2376205	LTB	Lymphotoxin beta (TNF superfamily, member 3)	6_qbl_hap2	4050	GeneID:4050	9.00998	8.21734	-0.792631	-4.50486	9.17853e-06	0.000394966	down high- vs. low-risk
ILMN_1738552	SLC1A3	Solute carrier family 1 (glial high affinity glutamate transporter), member 3	5p13.2	6507	GeneID:6507	8.09041	7.63228	-0.458134	-4.51125	8.92176e-06	0.000386692	down high- vs. low-risk
ILMN_1691071	FCRLA	Fc receptor-like A	1q23.3	84824	GeneID:84824	6.66263	6.03407	-0.628566	-4.51241	8.87596e-06	0.00038657	down high- vs. low-risk
ILMN_1771385	GBP4	guanylate binding protein 4	1p22.2	115361	GeneID:115361	8.33723	7.74345	-0.593785	-4.51511	8.77011e-06	0.000384284	down high- vs. low-risk
ILMN_2415786	CD96	CD96 molecule	3q13.2	10225	GeneID:10225	7.19524	6.69915	-0.496092	-4.52596	8.35623e-06	0.000371329	down high- vs. low-risk
ILMN_1764788	TNFRSF1B	Tumor necrosis factor receptor superfamily, member 1B	1p36.22	7133	GeneID:7133	7.11822	6.78421	-0.33401	-4.53755	7.93543e-06	0.000357734	down high- vs. low-risk
ILMN_1731233	GZMH	Granzyme H (cathepsin G-like 2, protein h-CCPX)	14q12	2999	GeneID:2999	6.86578	6.40649	-0.459289	-4.54582	7.64752e-06	0.000349131	down high- vs. low-risk
ILMN_2170814	LAMP3	Lysosomal-associated membrane protein 3	3q27.1	27074	GeneID:27074	7.9706	7.32059	-0.650016	-4.54596	7.64265e-06	0.000349131	down high- vs. low-risk
ILMN_2337928	CXCR5	Chemokine (C-X-C motif) receptor 5	11q23.3	643	GeneID:643	6.23109	5.6944	-0.536686	-4.5574	7.26099e-06	0.00033661	down high- vs. low-risk
ILMN_1708041	PLEKHF1	Pleckstrin homology domain containing, family F (with FYVE domain) member 1	19q12	79156	GeneID:79156	8.48387	8.00395	-0.479917	-4.55958	7.19051e-06	0.000334848	down high- vs. low-risk
ILMN_1756862	APOL3	Apolipoprotein L, 3	22q12.3	80833	GeneID:80833	8.19934	7.70093	-0.498406	-4.5608	7.15108e-06	0.000334848	down high- vs. low-risk
ILMN_1702691	TNFAIP3	Tumor necrosis factor, alpha-induced protein 3	6q23.3	7128	GeneID:7128	8.02658	7.64841	-0.378165	-4.5779	6.62267e-06	0.000314425	down high- vs. low-risk
ILMN_1661646	BANK1	B-cell scaffold protein with ankyrin repeats 1	4q24	55024	GeneID:55024	6.47923	5.92562	-0.553608	-4.57978	6.56696e-06	0.000313319	down high- vs. low-risk
ILMN_1770768	SLAMF1	Signaling lymphocytic activation molecule family member 1	1q23.3	6504	GeneID:6504	6.2382	5.8844	-0.353794	-4.58169	6.51064e-06	0.000311458	down high- vs. low-risk
ILMN_1707491	KIAA0125	KIAA0125	14q32.33	9834	GeneID:9834	5.8758	5.54793	-0.327868	-4.58308	6.46996e-06	0.000310894	down high- vs. low-risk
ILMN_1761314	NFS1	NFS1 nitrogen fixation 1 homolog (S. cerevisiae)	20q11.22	9054	GeneID:9054	8.16974	7.62714	-0.542601	-4.58408	6.44101e-06	0.000310605	down high- vs. low-risk
ILMN_1788841	TCL1A	T-cell leukemia/lymphoma 1A	14q32.13	8115	GeneID:8115	5.96544	5.52147	-0.443966	-4.59011	6.26843e-06	0.000305714	down high- vs. low-risk
ILMN_1709795	RAC2	Ras-related C3 botulinum toxin substrate 2 (rho family, small GTP binding protein Rac2)	22q13.1	5880	GeneID:5880	9.699	9.0661	-0.632893	-4.59291	6.1897e-06	0.000304195	down high- vs. low-risk
ILMN_2325837	CD3D	CD3d molecule, delta (CD3-TCR complex)	11q23.3	915	GeneID:915	8.73859	8.00797	-0.730625	-4.59605	6.10272e-06	0.000300742	down high- vs. low-risk
ILMN_1718552	CXCL13	Chemokine (C-X-C motif) ligand 13	4q21.1	10563	GeneID:10563	7.46141	6.70459	-0.756823	-4.61118	5.69949e-06	0.000285565	down high- vs. low-risk
ILMN_1691693	FCRL3	Fc receptor-like 3	1q23.1	115352	GeneID:115352	6.24375	5.82625	-0.417494	-4.61661	5.56105e-06	0.000283142	down high- vs. low-risk
ILMN_1785202	STAT4	Signal transducer and activator of transcription 4	2q32.3	6775	GeneID:6775	7.19709	6.73166	-0.465433	-4.62111	5.44895e-06	0.000282814	down high- vs. low-risk
ILMN_2109416	NAPSB	Napsin B aspartic peptidase pseudogene	19q13.33	256236	GeneID:256236	7.81469	7.20118	-0.613511	-4.62398	5.37834e-06	0.000281491	down high- vs. low-risk
ILMN_1718734	MLLT6	Myeloid/lymphoid or mixed-lineage leukemia (trithorax homolog, Drosophila); translocated to, 6	17q12	4302	GeneID:4302	8.46687	8.12847	-0.338396	-4.62925	5.25139e-06	0.000277817	down high- vs. low-risk
ILMN_2205963	C10orf54	Chromosome 10 open reading frame 54	10q22.1	64115	GeneID:64115	6.85432	6.52399	-0.330333	-4.63978	5.00621e-06	0.000265627	down high- vs. low-risk
ILMN_2114568	GBP5	Guanylate binding protein 5	1p22.2	115362	GeneID:115362	7.94033	7.28349	-0.656835	-4.64426	4.90506e-06	0.00026103	down high- vs. low-risk
ILMN_2059549	SYK	Spleen tyrosine kinase	9q22.2	6850	GeneID:6850	8.44587	8.02356	-0.422308	-4.64494	4.89001e-06	0.00026103	down high- vs. low-risk
ILMN_1810420	DYSF	Dysferlin, limb girdle muscular dystrophy 2B (autosomal recessive)	2p13.3	8291	GeneID:8291	7.71352	7.35886	-0.35466	-4.64548	4.87792e-06	0.00026103	down high- vs. low-risk
ILMN_1745356	CXCL9	Chemokine (C-X-C motif) ligand 9	4q21.1	4283	GeneID:4283	9.69465	8.72479	-0.969853	-4.65112	4.75425e-06	0.000256803	down high- vs. low-risk
ILMN_1724407	TACC3	Transforming, acidic coiled-coil containing protein 3	4p16.3	10460	GeneID:10460	7.26776	6.91529	-0.352476	-4.66312	4.50108e-06	0.000246084	down high- vs. low-risk
ILMN_1697409	TNFRSF14	Tumor necrosis factor receptor superfamily, member 14 (herpesvirus entry mediator)	1p36.32	8764	GeneID:8764	10.063	9.64944	-0.413523	-4.66748	4.41237e-06	0.000242696	down high- vs. low-risk
ILMN_1681301	AIM2	Absent in melanoma 2	1q23.2	9447	GeneID:9447	7.18643	6.64655	-0.539882	-4.67173	4.32753e-06	0.000240247	down high- vs. low-risk
ILMN_2390299	PSMB8	Proteasome (prosome, macropain) subunit, beta type, 8 (large multifunctional peptidase 7)	6_cox_hap1	5696	GeneID:5696	9.8397	9.36683	-0.472871	-4.6809	4.14979e-06	0.000232533	down high- vs. low-risk
ILMN_1678238	ZNF683	Zinc finger protein 683	1p36.11	257101	GeneID:257101	6.81437	6.33886	-0.475507	-4.69039	3.97319e-06	0.000225878	down high- vs. low-risk
ILMN_1705892	SH2D1A	SH2 domain protein 1A	Xq25	4068	GeneID:4068	6.62568	6.25811	-0.367564	-4.69125	3.95754e-06	0.000225878	down high- vs. low-risk
ILMN_2098126	CCL5	Chemokine (C-C motif) ligand 5	17q12	6352	GeneID:6352	10.8814	10.1204	-0.76107	-4.69382	3.91112e-06	0.000225481	down high- vs. low-risk
ILMN_1710740	C2	Putative uncharacterized protein DKFZp779M0311 (Fragment).	6_qbl_hap2	717	GeneID:717	7.56215	7.12303	-0.439114	-4.7028	3.75312e-06	0.000220614	down high- vs. low-risk
ILMN_1797822	KIAA0746	KIAA0746 protein	4p15.2	23231	GeneID:23231	8.10504	7.59115	-0.513891	-4.71713	3.51368e-06	0.00021067	down high- vs. low-risk
ILMN_1690566	RASSF4	Ras association (RalGDS/AF-6) domain family member 4	10q11.21	83937	GeneID:83937	7.32456	6.95259	-0.371976	-4.72215	3.43332e-06	0.000207234	down high- vs. low-risk
ILMN_1812278	LY9	Lymphocyte antigen 9	1q23.3	4063	GeneID:4063	6.03984	5.70166	-0.338188	-4.74102	3.14664e-06	0.000195988	down high- vs. low-risk
ILMN_1674640	CXCR6	Chemokine (C-X-C motif) receptor 6	3p21.31	10663	GeneID:10663	6.34561	5.97859	-0.36702	-4.74256	3.12439e-06	0.000195815	down high- vs. low-risk
ILMN_2109489	GZMB	granzyme B	14q12	3002	GeneID:3002	7.95218	7.19029	-0.761897	-4.74679	3.0638e-06	0.000192689	down high- vs. low-risk
ILMN_1782704	CD19	CD19 molecule	16p11.2	930	GeneID:930	6.88036	6.15286	-0.727495	-4.75388	2.96472e-06	0.000187771	down high- vs. low-risk
ILMN_1732967	KIAA1949	KIAA1949	6_qbl_hap2	170954	GeneID:170954	9.00806	8.63483	-0.373237	-4.75548	2.94286e-06	0.000187435	down high- vs. low-risk
ILMN_1667232	KIR2DL3	Killer cell immunoglobulin-like receptor, two domains, long cytoplasmic tail, 1	19q13.42	3804	GeneID:3804	6.05161	5.67969	-0.371917	-4.77893	2.63903e-06	0.000171367	down high- vs. low-risk
ILMN_1701455	FBXO6	F-box protein 6	1p36.22	26270	GeneID:26270	7.85929	7.5078	-0.351481	-4.78815	2.52814e-06	0.000165964	down high- vs. low-risk
ILMN_1667371	SLA	Src-like-adaptor	8q24.22	6503	GeneID:6503	7.5398	7.1073	-0.432496	-4.78922	2.51558e-06	0.000165744	down high- vs. low-risk
ILMN_1739756	KIR2DL4	Killer cell immunoglobulin-like receptor, two domains, long cytoplasmic tail, 4	19_random	3805	GeneID:3805	6.14151	5.81666	-0.324855	-4.79301	2.4715e-06	0.000163439	down high- vs. low-risk
ILMN_1794612	UBA7	Ubiquitin-like modifier activating enzyme 7	3p21.31	7318	GeneID:7318	8.10317	7.69374	-0.409433	-4.80007	2.39131e-06	0.000160496	down high- vs. low-risk
ILMN_1712431	FAM113B	Family with sequence similarity 113, member B	12q13.11	91523	GeneID:91523	8.31385	7.81879	-0.495058	-4.80731	2.31171e-06	0.00015632	down high- vs. low-risk
ILMN_1718621	TSPAN32	Tetraspanin 32	11p15.5	10077	GeneID:10077	6.65114	6.25195	-0.399191	-4.81788	2.2001e-06	0.000152523	down high- vs. low-risk
ILMN_1679826	CST7	Cystatin F (leukocystatin)	20p11.21	8530	GeneID:8530	7.12165	6.66201	-0.459643	-4.82368	2.14109e-06	0.000151028	down high- vs. low-risk
ILMN_2366212	CD79B	CD79b molecule, immunoglobulin-associated beta	17q23.3	974	GeneID:974	8.15402	7.42686	-0.727158	-4.82417	2.13623e-06	0.000151028	down high- vs. low-risk
ILMN_1682930	SIPA1	Signal-induced proliferation-associated 1	11q13.1	6494	GeneID:6494	8.84029	8.51631	-0.323975	-4.82765	2.10162e-06	0.000150892	down high- vs. low-risk
ILMN_1691717	RHBDF2	Rhomboid 5 homolog 2 (Drosophila)	17q25.1	79651	GeneID:79651	8.67894	8.29728	-0.381668	-4.82934	2.08495e-06	0.000150892	down high- vs. low-risk
ILMN_2395981	PYHIN1	Pyrin and HIN domain family, member 1	1q23.1	149628	GeneID:149628	6.66398	6.26466	-0.399325	-4.83395	2.04031e-06	0.000149794	down high- vs. low-risk
ILMN_1677200	CYFIP2	Cytoplasmic FMR1 interacting protein 2	5q33.3	26999	GeneID:26999	8.74194	8.18669	-0.555254	-4.84199	1.96466e-06	0.000146633	down high- vs. low-risk
ILMN_1750805	ARHGAP30	Rho GTPase activating protein 30	1q23.3	257106	GeneID:257106	8.53249	8.16951	-0.36298	-4.84236	1.9612e-06	0.000146633	down high- vs. low-risk
ILMN_1701911	C5orf20	Chromosome 5 open reading frame 20	5q31.1	140947	GeneID:140947	6.39788	6.03175	-0.366132	-4.84853	1.90512e-06	0.000145202	down high- vs. low-risk
ILMN_2258816	SAMD3	Sterile alpha motif domain containing 3	6q23.1	154075	GeneID:154075	6.34867	5.98821	-0.360464	-4.84866	1.90394e-06	0.000145202	down high- vs. low-risk
ILMN_2375319	RASGRP2	RAS guanyl releasing protein 2 (calcium and DAG-regulated)	11q13.1	10235	GeneID:10235	5.94841	5.59995	-0.34846	-4.85319	1.86369e-06	0.000143747	down high- vs. low-risk
ILMN_1789830	CFLAR	CASP8 and FADD-like apoptosis regulator	2q33.1	8837	GeneID:8837	9.5802	9.25101	-0.329185	-4.85399	1.85671e-06	0.000143747	down high- vs. low-risk
ILMN_1803686	ADA	Adenosine deaminase	20q13.12	100	GeneID:100	8.19811	7.83945	-0.358664	-4.85439	1.85324e-06	0.000143747	down high- vs. low-risk
ILMN_1751079	TAP1	Transporter 1, ATP-binding cassette, sub-family B (MDR/TAP)	6_cox_hap1	6890	GeneID:6890	11.1755	10.562	-0.613488	-4.86158	1.79137e-06	0.000141324	down high- vs. low-risk
ILMN_1727402	HCLS1	Hematopoietic cell-specific Lyn substrate 1	3q13.33	3059	GeneID:3059	9.62028	9.03822	-0.582063	-4.8764	1.67023e-06	0.00013472	down high- vs. low-risk
ILMN_1753112	CD5	CD5 molecule	11q12.2	921	GeneID:921	6.17268	5.83525	-0.33743	-4.885	1.60363e-06	0.000130519	down high- vs. low-risk
ILMN_1718558	PARP12	Poly (ADP-ribose) polymerase family, member 12	7q34	64761	GeneID:64761	8.77313	8.35157	-0.421558	-4.88663	1.59128e-06	0.000130103	down high- vs. low-risk
ILMN_1688279	PVRIG	Poliovirus receptor related immunoglobulin domain containing	7q22.1	79037	GeneID:79037	6.87931	6.29776	-0.581555	-4.88687	1.58944e-06	0.000130103	down high- vs. low-risk
ILMN_1759743	SLC38A10	Solute carrier family 38, member 10	17q25.3	124565	GeneID:124565	7.33371	6.97225	-0.361462	-4.89713	1.51394e-06	0.000126659	down high- vs. low-risk
ILMN_2399264	sept-06	Septin 6	Xq24	23157	GeneID:23157	7.14837	6.81953	-0.328841	-4.8992	1.49913e-06	0.000126005	down high- vs. low-risk
ILMN_1723004	CD72	CD72 molecule	9p13.3	971	GeneID:971	6.70978	6.35917	-0.350607	-4.90114	1.48543e-06	0.00012544	down high- vs. low-risk
ILMN_1772686	FGD3	FYVE, RhoGEF and PH domain containing 3	9q22.31	89846	GeneID:89846	8.24014	7.76541	-0.474723	-4.90443	1.46233e-06	0.000124523	down high- vs. low-risk
ILMN_1790692	GNLY	Granulysin	2p11.2	10578	GeneID:10578	8.02134	7.25469	-0.766648	-4.90793	1.43826e-06	0.000123192	down high- vs. low-risk
ILMN_1726222	FLOT2	Flotillin 2	17q11.2	2319	GeneID:2319	10.5597	10.2351	-0.324513	-4.91898	1.36451e-06	0.000119144	down high- vs. low-risk
ILMN_1769383	GIMAP5	GTPase, IMAP family member 5	7q36.1	55340	GeneID:55340	7.8972	7.3478	-0.549396	-4.91934	1.36221e-06	0.000119144	down high- vs. low-risk
ILMN_1667825	MLKL	Mixed lineage kinase domain-like	16q22.3	197259	GeneID:197259	8.26899	7.85513	-0.413866	-4.92324	1.3371e-06	0.000119062	down high- vs. low-risk
ILMN_1788017	HSH2D	Hematopoietic SH2 domain containing	19p13.11	84941	GeneID:84941	6.44642	6.03216	-0.414261	-4.9248	1.32721e-06	0.00011877	down high- vs. low-risk
ILMN_1660462	MCOLN2	Mucolipin 2	1p22.3	255231	GeneID:255231	7.82712	7.35605	-0.471079	-4.93412	1.26946e-06	0.000115241	down high- vs. low-risk
ILMN_1806908	PRKCB1	Protein kinase C, beta	16p12.1	5579	GeneID:5579	7.7419	7.06861	-0.673286	-4.94178	1.22387e-06	0.000112893	down high- vs. low-risk
ILMN_1708006	MICB	MHC class I polypeptide-related sequence A	6p21.33	4277	GeneID:4277	6.82308	6.4406	-0.382483	-4.9623	1.10927e-06	0.000103381	down high- vs. low-risk
ILMN_1727098	PPP1R16B	Protein phosphatase 1, regulatory (inhibitor) subunit 16B	20q11.23	26051	GeneID:26051	6.96923	6.435	-0.534229	-4.96377	1.10149e-06	0.000103191	down high- vs. low-risk
ILMN_1690963	DDEF1	ArfGAP with SH3 domain, ankyrin repeat and PH domain 1	8q24.21	50807	GeneID:50807	9.74571	9.39721	-0.348508	-4.96465	1.09687e-06	0.000103191	down high- vs. low-risk
ILMN_1772359	LAPTM5	Lysosomal multispanning membrane protein 5	1p35.2	7805	GeneID:7805	9.39792	8.87778	-0.520138	-4.96673	1.08594e-06	0.000103191	down high- vs. low-risk
ILMN_2353732	CD8A	CD8a molecule	2p11.2	925	GeneID:925	7.94771	7.25556	-0.692148	-4.96735	1.08275e-06	0.000103191	down high- vs. low-risk
ILMN_1715131	CCR7	Chemokine (C-C motif) receptor 7	17q21.2	1236	GeneID:1236	7.1447	6.45368	-0.691025	-4.99518	9.47013e-07	9.25766e-05	down high- vs. low-risk
ILMN_2082209	C20orf100	TOX high mobility group box family member 2	20q13.12	84969	GeneID:84969	7.66557	7.14308	-0.522494	-4.99563	9.44955e-07	9.25766e-05	down high- vs. low-risk
ILMN_2112256	TNFRSF4	Tumor necrosis factor receptor superfamily, member 4	1p36.33	7293	GeneID:7293	7.79192	7.41618	-0.375736	-4.99801	9.34163e-07	9.2324e-05	down high- vs. low-risk
ILMN_1796339	PLEKHA2	Pleckstrin homology domain containing, family A (phosphoinositide binding specific) member 2	8p11.23	59339	GeneID:59339	8.50153	8.14037	-0.361158	-5.00758	8.91985e-07	8.9135e-05	down high- vs. low-risk
ILMN_1682993	NKG7	Natural killer cell group 7 sequence	19q13.33	4818	GeneID:4818	8.24048	7.49213	-0.748355	-5.01524	8.59574e-07	8.73521e-05	down high- vs. low-risk
ILMN_1784467	NUP210	Nucleoporin 210kDa	3p25.1	23225	GeneID:23225	7.36685	6.94446	-0.422388	-5.02112	8.35448e-07	8.56956e-05	down high- vs. low-risk
ILMN_1803945	HCP5	HLA complex P5	6_cox_hap1	10866	GeneID:10866	10.0506	9.44343	-0.607173	-5.03827	7.68762e-07	8.08647e-05	down high- vs. low-risk
ILMN_1812552	PHCA	Alkaline ceramidase 3	11q13.5	55331	GeneID:55331	8.07412	7.68678	-0.387335	-5.05079	7.23391e-07	7.90897e-05	down high- vs. low-risk
ILMN_1700428	HLA-DOB	Major histocompatibility complex, class II, DO beta	6p21.32	3112	GeneID:3112	7.20469	6.65883	-0.545859	-5.05622	7.04527e-07	7.82251e-05	down high- vs. low-risk
ILMN_1666269	CTSZ	Cathepsin Z	20q13.32	1522	GeneID:1522	8.66467	8.26562	-0.39905	-5.07606	6.39556e-07	7.2809e-05	down high- vs. low-risk
ILMN_1695025	CD2	CD2 molecule	1p13.1	914	GeneID:914	8.60869	7.8578	-0.750882	-5.08336	6.17118e-07	7.0702e-05	down high- vs. low-risk
ILMN_2112988	NCF1C	Neutrophil cytosolic factor 1C pseudogene	7q11.23	654817	GeneID:654817	6.77383	6.35098	-0.422854	-5.09911	5.71342e-07	6.63021e-05	down high- vs. low-risk
ILMN_1740633	PRF1	Perforin 1 (pore forming protein)	10q22.1	5551	GeneID:5551	6.67112	6.20111	-0.47001	-5.11311	5.33405e-07	6.27089e-05	down high- vs. low-risk
ILMN_1724066	PLCB2	Phospholipase C, beta 2	15q15.1	5330	GeneID:5330	7.06731	6.66767	-0.399639	-5.1327	4.84379e-07	5.80841e-05	down high- vs. low-risk
ILMN_1684349	IL2RB	Interleukin 2 receptor, beta	22q12.3	3560	GeneID:3560	7.66111	7.06916	-0.591948	-5.14744	4.50423e-07	5.47422e-05	down high- vs. low-risk
ILMN_1683026	PSMB10	Proteasome (prosome, macropain) subunit, beta type, 10	16q22.1	5699	GeneID:5699	10.854	10.461	-0.392917	-5.15276	4.38737e-07	5.40524e-05	down high- vs. low-risk
ILMN_1746864	PSCDBP	Cytohesin 1 interacting protein	2q24.1	9595	GeneID:9595	6.69845	6.31816	-0.380293	-5.16751	4.07847e-07	5.05932e-05	down high- vs. low-risk
ILMN_1708375	IRF1	Interferon regulatory factor 1	5q31.1	3659	GeneID:3659	9.58977	9.01661	-0.573158	-5.17364	3.95636e-07	4.94193e-05	down high- vs. low-risk
ILMN_2327860	MAL	Mal, T-cell differentiation protein	2q11.1	4118	GeneID:4118	7.03431	6.35736	-0.676953	-5.18285	3.77974e-07	4.78781e-05	down high- vs. low-risk
ILMN_1674160	BIN1	Bridging integrator 1	2q14.3	274	GeneID:274	8.49863	8.00784	-0.490795	-5.19222	3.6077e-07	4.6023e-05	down high- vs. low-risk
ILMN_2207291	IFNG	Interferon, gamma	12q15	3458	GeneID:3458	6.11914	5.68503	-0.434106	-5.19724	3.51881e-07	4.55349e-05	down high- vs. low-risk
ILMN_1669927	ICOS	Inducible T-cell co-stimulator	2q33.2	29851	GeneID:29851	6.89667	6.43155	-0.465123	-5.19813	3.50329e-07	4.55349e-05	down high- vs. low-risk
ILMN_1726597	FAM65B	Family with sequence similarity 65, member B	6p22.2	9750	GeneID:9750	6.94018	6.35157	-0.588602	-5.19866	3.49401e-07	4.55349e-05	down high- vs. low-risk
ILMN_1672417	PTPRCAP	Protein tyrosine phosphatase, receptor type, C-associated protein	11q13.1	5790	GeneID:5790	7.10845	6.53433	-0.574116	-5.20366	3.408e-07	4.50738e-05	down high- vs. low-risk
ILMN_1751886	REC8	REC8 homolog (yeast)	14q12	9985	GeneID:9985	7.31547	6.91151	-0.40396	-5.20765	3.34107e-07	4.45159e-05	down high- vs. low-risk
ILMN_1765258	HLA-E	Major histocompatibility complex, class I, E	6_cox_hap1	3133	GeneID:3133	9.70218	9.22048	-0.481698	-5.22904	3.00264e-07	4.09159e-05	down high- vs. low-risk
ILMN_1777998	ARHGAP25	Rho GTPase activating protein 25	2p14	9938	GeneID:9938	7.55729	7.0562	-0.50109	-5.22971	2.99252e-07	4.09159e-05	down high- vs. low-risk
ILMN_2093775	ZNF831	Zinc finger protein 831	20q13.32	128611	GeneID:128611	5.97468	5.64917	-0.32551	-5.23609	2.89853e-07	4.01049e-05	down high- vs. low-risk
ILMN_1784320	ELMO1	Engulfment and cell motility 1	7p14.2	9844	GeneID:9844	7.37188	6.96455	-0.407324	-5.23756	2.8773e-07	4.01049e-05	down high- vs. low-risk
ILMN_1779257	CD40	CD40 molecule, TNF receptor superfamily member 5	20q13.12	958	GeneID:958	6.83762	6.46693	-0.370687	-5.23766	2.87589e-07	4.01049e-05	down high- vs. low-risk
ILMN_1727284	CD4	CD4 molecule	12p13.31	920	GeneID:920	6.82201	6.44387	-0.378138	-5.23903	2.85626e-07	4.01049e-05	down high- vs. low-risk
ILMN_2362902	RASSF5	Ras association (RalGDS/AF-6) domain family member 5	1q32.1	83593	GeneID:83593	8.22129	7.70871	-0.512581	-5.24112	2.82644e-07	4.01049e-05	down high- vs. low-risk
ILMN_1717197	CD3G	CD3g molecule, gamma (CD3-TCR complex)	11q23.3	917	GeneID:917	6.51446	6.06464	-0.449818	-5.24201	2.81383e-07	4.01049e-05	down high- vs. low-risk
ILMN_1703327	PSTPIP1	Proline-serine-threonine phosphatase interacting protein 1	15q24.3	9051	GeneID:9051	6.3988	6.03475	-0.364048	-5.2479	2.732e-07	3.96299e-05	down high- vs. low-risk
ILMN_1667224	SLAMF8	SLAM family member 8	1q23.2	56833	GeneID:56833	7.13084	6.67791	-0.452927	-5.25721	2.60735e-07	3.81291e-05	down high- vs. low-risk
ILMN_1673363	CD97	CD97 antigen isoform 1 precursor	19p13.12	976	GeneID:976	8.81754	8.31705	-0.500492	-5.25981	2.57347e-07	3.79422e-05	down high- vs. low-risk
ILMN_1676924	CD247	CD247 molecule	1q24.2	919	GeneID:919	8.37376	7.63378	-0.739981	-5.28677	2.2469e-07	3.42504e-05	down high- vs. low-risk
ILMN_1711994	TCIRG1	T-cell, immune regulator 1, ATPase, H+ transporting, lysosomal V0 subunit A3	11q13.2	10312	GeneID:10312	8.38973	7.92848	-0.461252	-5.31407	1.95733e-07	3.06147e-05	down high- vs. low-risk
ILMN_1801105	PRKCD	Protein kinase C, delta	3p21.1	5580	GeneID:5580	9.12031	8.75914	-0.361167	-5.31508	1.94735e-07	3.06147e-05	down high- vs. low-risk
ILMN_1745374	IFI35	Interferon-induced protein 35	17q21.31	3430	GeneID:3430	8.8421	8.33841	-0.503691	-5.32169	1.88318e-07	3.05164e-05	down high- vs. low-risk
ILMN_1695851	PARVG	Parvin, gamma	22q13.31	64098	GeneID:64098	7.79016	7.30494	-0.485222	-5.33011	1.80442e-07	3.00523e-05	down high- vs. low-risk
ILMN_1761463	EFHD2	EF-hand domain family, member D2	1p36.21	79180	GeneID:79180	9.43021	9.05546	-0.374753	-5.34877	1.64118e-07	2.81144e-05	down high- vs. low-risk
ILMN_1719756	ZAP70	Zeta-chain (TCR) associated protein kinase 70kDa	2q11.2	7535	GeneID:7535	6.34058	5.89489	-0.445693	-5.35739	1.57068e-07	2.74293e-05	down high- vs. low-risk
ILMN_1711383	STK4	Serine/threonine kinase 4	20q13.12	6789	GeneID:6789	9.73297	9.3941	-0.338868	-5.36803	1.48771e-07	2.67598e-05	down high- vs. low-risk
ILMN_1659895	MSN	Moesin	Xq11.1	4478	GeneID:4478	10.4732	10.0829	-0.390364	-5.38501	1.36408e-07	2.47837e-05	down high- vs. low-risk
ILMN_1768284	P2RY8	Purinergic receptor P2Y, G-protein coupled, 8	Xp22.33	286530	GeneID:286530	6.99161	6.40909	-0.582518	-5.38924	1.33484e-07	2.45e-05	down high- vs. low-risk
ILMN_2196078	SLAMF6	SLAM family member 6	1q23.2	114836	GeneID:114836	7.77776	7.0508	-0.72695	-5.39786	1.2772e-07	2.36837e-05	down high- vs. low-risk
ILMN_2366330	FERMT3	Fermitin family homolog 3 (Drosophila)	11q13.1	83706	GeneID:83706	8.63585	8.09592	-0.539932	-5.4081	1.21183e-07	2.27056e-05	down high- vs. low-risk
ILMN_1802708	BTN3A1	Butyrophilin, subfamily 3, member A1	6p22.1	11119	GeneID:11119	7.51268	7.10392	-0.408759	-5.42344	1.1199e-07	2.14297e-05	down high- vs. low-risk
ILMN_1738749	MAST3	Microtubule associated serine/threonine kinase 3	19p13.11	23031	GeneID:23031	7.36049	7.01775	-0.342739	-5.43369	1.06236e-07	2.08581e-05	down high- vs. low-risk
ILMN_1691731	PARP14	Poly (ADP-ribose) polymerase family, member 14	3q21.1	54625	GeneID:54625	8.24637	7.78934	-0.457025	-5.43963	1.0303e-07	2.08228e-05	down high- vs. low-risk
ILMN_1770824	ARHGAP4	Rho GTPase activating protein 4	Xq28	393	GeneID:393	7.93212	7.45984	-0.472285	-5.45256	9.63769e-08	1.99258e-05	down high- vs. low-risk
ILMN_1686555	FYN	FYN oncogene related to SRC, FGR, YES	6q21	2534	GeneID:2534	7.9548	7.50151	-0.453293	-5.4529	9.62087e-08	1.99258e-05	down high- vs. low-risk
ILMN_1794364	CTSW	Cathepsin W	11q13.1	1521	GeneID:1521	6.23684	5.87405	-0.362797	-5.45637	9.44979e-08	1.99258e-05	down high- vs. low-risk
ILMN_1710434	TBC1D10C	TBC1 domain family, member 10C	11q13.1	374403	GeneID:374403	7.49887	6.83118	-0.667684	-5.46296	9.13333e-08	1.97931e-05	down high- vs. low-risk
ILMN_1807972	MICAL1	Microtubule associated monoxygenase, calponin and LIM domain containing 1	6q21	64780	GeneID:64780	7.88597	7.47346	-0.412512	-5.4669	8.94875e-08	1.96296e-05	down high- vs. low-risk
ILMN_1676575	IKZF1	IKAROS family zinc finger 1 (Ikaros)	7p12.2	10320	GeneID:10320	7.12776	6.56844	-0.559326	-5.46802	8.89691e-08	1.96296e-05	down high- vs. low-risk
ILMN_1690921	STAT2	Signal transducer and activator of transcription 2, 113kDa	12q13.2	6773	GeneID:6773	10.8135	10.4426	-0.370913	-5.50125	7.48752e-08	1.74908e-05	down high- vs. low-risk
ILMN_1721762	IL18RAP	Interleukin 18 receptor accessory protein	2q12.1	8807	GeneID:8807	6.29978	5.92607	-0.373706	-5.52691	6.55033e-08	1.55029e-05	down high- vs. low-risk
ILMN_1663916	ARHGAP9	Rho GTPase activating protein 9	12q13.3	64333	GeneID:64333	8.2389	7.61075	-0.628152	-5.52787	6.51728e-08	1.55029e-05	down high- vs. low-risk
ILMN_2337655	WARS	Tryptophanyl-tRNA synthetase	14q32.2	7453	GeneID:7453	10.5099	9.87967	-0.630233	-5.53914	6.14445e-08	1.51221e-05	down high- vs. low-risk
ILMN_1668526	GVIN1	Homo sapiens cDNA FLJ13373 fis, clone PLACE1000749.	11p15.4	387751	GeneID:387751	7.77553	7.06446	-0.711074	-5.54238	6.04138e-08	1.50927e-05	down high- vs. low-risk
ILMN_1803560	LAT2	Linker for activation of T cells family, member 2	7q11.23	7462	GeneID:7462	7.19273	6.79568	-0.397057	-5.54273	6.03028e-08	1.50927e-05	down high- vs. low-risk
ILMN_1760509	EOMES	Eomesodermin homolog (Xenopus laevis)	3p24.1	8320	GeneID:8320	7.12338	6.52608	-0.597301	-5.54816	5.86136e-08	1.50613e-05	down high- vs. low-risk
ILMN_1760027	WAS	Wiskott-Aldrich syndrome (eczema-thrombocytopenia)	Xp11.23	7454	GeneID:7454	9.23543	8.63833	-0.597092	-5.55307	5.71228e-08	1.50613e-05	down high- vs. low-risk
ILMN_1797975	CXCR3	Chemokine (C-X-C motif) receptor 3	Xq13.1	2833	GeneID:2833	6.58149	6.08017	-0.501318	-5.56934	5.24489e-08	1.42941e-05	down high- vs. low-risk
ILMN_1750401	C17orf62	Chromosome 17 open reading frame 62	17q25.3	79415	GeneID:79415	8.69249	8.35802	-0.334467	-5.64455	3.52593e-08	1.03799e-05	down high- vs. low-risk
ILMN_1739794	CD3E	CD3e molecule, epsilon (CD3-TCR complex)	11q23.3	916	GeneID:916	6.32434	5.88795	-0.436383	-5.65468	3.34129e-08	1.01865e-05	down high- vs. low-risk
ILMN_1795464	LTA	Lymphotoxin alpha (TNF superfamily, member 1)	6_cox_hap1	4049	GeneID:4049	6.6957	6.21533	-0.480369	-5.66446	3.17194e-08	9.83694e-06	down high- vs. low-risk
ILMN_1813338	LAG3	Lymphocyte-activation gene 3	12p13.31	3902	GeneID:3902	7.39351	6.72556	-0.667943	-5.66564	3.15195e-08	9.83694e-06	down high- vs. low-risk
ILMN_1691364	STAT1	Signal transducer and activator of transcription 1, 91kDa	2q32.2	6772	GeneID:6772	11.0297	10.2804	-0.749274	-5.67811	2.94939e-08	9.56642e-06	down high- vs. low-risk
ILMN_1763487	CTLA4	Cytotoxic T-lymphocyte-associated protein 4	2q33.2	1493	GeneID:1493	6.76655	6.28963	-0.476914	-5.68002	2.91948e-08	9.56642e-06	down high- vs. low-risk
ILMN_2404625	LAT	Linker for activation of T cells	16p11.2	27040	GeneID:27040	7.13734	6.66666	-0.470682	-5.71202	2.4605e-08	8.35045e-06	down high- vs. low-risk
ILMN_2334296	IL18BP	Interleukin 18 binding protein	11q13.4	10068	GeneID:10068	8.92073	8.31968	-0.601057	-5.71848	2.37682e-08	8.22161e-06	down high- vs. low-risk
ILMN_1692295	MYO1G	Myosin IG	7p13	64005	GeneID:64005	7.01383	6.59672	-0.417107	-5.72488	2.29667e-08	8.10011e-06	down high- vs. low-risk
ILMN_2183687	LIME1	Lck interacting transmembrane adaptor 1	20q13.33	54923	GeneID:54923	8.6187	8.03739	-0.581312	-5.7397	2.12083e-08	7.62956e-06	down high- vs. low-risk
ILMN_2289093	KIAA1618	KIAA1618	17q25.3	57714	GeneID:57714	7.59685	7.13557	-0.461273	-5.7555	1.94799e-08	7.15867e-06	down high- vs. low-risk
ILMN_1746565	CD6	CD6 molecule	11q12.2	923	GeneID:923	7.98319	7.29217	-0.69102	-5.75639	1.93868e-08	7.15867e-06	down high- vs. low-risk
ILMN_1692539	SH3BP1	SH3-domain binding protein 1	22q13.1	23616	GeneID:23616	6.76736	6.39143	-0.375932	-5.75818	1.92005e-08	7.15867e-06	down high- vs. low-risk
ILMN_1744212	INPP5D	Inositol polyphosphate-5-phosphatase, 145kDa	2q37.1	3635	GeneID:3635	6.95845	6.53722	-0.421231	-5.76823	1.8187e-08	7.15867e-06	down high- vs. low-risk
ILMN_1792538	CD7	CD7 molecule	17q25.3	924	GeneID:924	7.20747	6.58878	-0.618688	-5.79047	1.61275e-08	6.59293e-06	down high- vs. low-risk
ILMN_1777519	ITGB7	Integrin, beta 7	12q13.13	3695	GeneID:3695	7.60036	7.02095	-0.579403	-5.81887	1.38255e-08	5.8821e-06	down high- vs. low-risk
ILMN_1770673	AKNA	AT-hook transcription factor	9q32	80709	GeneID:80709	7.91627	7.35594	-0.560331	-5.88449	9.66428e-09	4.34583e-06	down high- vs. low-risk
ILMN_1697554	SASH3	SAM and SH3 domain containing 3	Xq25	54440	GeneID:54440	7.41302	6.85701	-0.556005	-5.91323	8.2538e-09	4.0125e-06	down high- vs. low-risk
ILMN_2153787	ARRDC5	Arrestin domain containing 5	19p13.3	645432	GeneID:645432	5.98993	5.61893	-0.370997	-5.91806	8.03702e-09	4.0125e-06	down high- vs. low-risk
ILMN_1773380	UNC13D	Unc-13 homolog D (C. elegans)	17q25.1	201294	GeneID:201294	6.47555	6.078	-0.397554	-5.93061	7.50048e-09	3.85464e-06	down high- vs. low-risk
ILMN_1665943	MAP4K1	Mitogen-activated protein kinase kinase kinase kinase 1	19q13.2	11184	GeneID:11184	7.80007	7.11682	-0.683252	-5.96394	6.23889e-09	3.50688e-06	down high- vs. low-risk
ILMN_1651692	STK10	Serine/threonine kinase 10	5q35.1	6793	GeneID:6793	6.79718	6.46208	-0.335104	-5.98268	5.6235e-09	3.26293e-06	down high- vs. low-risk
ILMN_1805693	GMIP	GEM interacting protein	19p13.11	51291	GeneID:51291	7.22113	6.8434	-0.377726	-6.00848	4.87211e-09	2.92119e-06	down high- vs. low-risk
ILMN_1738675	PTPN6	Protein tyrosine phosphatase, non-receptor type 6	12p13.31	5777	GeneID:5777	8.74146	8.23769	-0.503768	-6.01272	4.75844e-09	2.92119e-06	down high- vs. low-risk
ILMN_1699160	ITK	IL2-inducible T-cell kinase	5q33.3	3702	GeneID:3702	7.12335	6.4904	-0.632943	-6.01367	4.73339e-09	2.92119e-06	down high- vs. low-risk
ILMN_1652185	IL4R	Interleukin 4 receptor	16p12.1	3566	GeneID:3566	7.70688	7.28329	-0.423588	-6.01877	4.60084e-09	2.92119e-06	down high- vs. low-risk
ILMN_1694084	PSCD1	Cytohesin 1	17q25.3	9267	GeneID:9267	9.73563	9.34423	-0.391405	-6.03347	4.2385e-09	2.92119e-06	down high- vs. low-risk
ILMN_1750321	LBA1	Lupus brain antigen 1	3p22.2	9881	GeneID:9881	7.43033	7.00052	-0.429808	-6.06327	3.58753e-09	2.58118e-06	down high- vs. low-risk
ILMN_1742450	TAPBP	TAP binding protein (tapasin)	6p21.32	6892	GeneID:6892	10.5363	10.0539	-0.482431	-6.14102	2.31524e-09	1.89294e-06	down high- vs. low-risk
ILMN_2125747	LOC606724	Coronin, actin binding protein, 1A	16p11.2	606724	GeneID:606724	7.75167	7.11692	-0.634751	-6.24221	1.30113e-09	1.17018e-06	down high- vs. low-risk
ILMN_2055634	TIAF1	TGFB1-induced anti-apoptotic factor 1	17q11.2	9220	GeneID:9220	9.51007	9.09285	-0.417218	-6.24292	1.29582e-09	1.17018e-06	down high- vs. low-risk
ILMN_1713749	CORO1A	Coronin, actin binding protein, 1A	16p11.2	11151	GeneID:11151	8.26035	7.57237	-0.687986	-6.30711	8.95778e-10	8.9514e-07	down high- vs. low-risk
ILMN_1794677	TMC6	Transmembrane channel-like 6	17q25.3	11322	GeneID:11322	8.35848	7.89693	-0.461547	-6.3195	8.33902e-10	8.82326e-07	down high- vs. low-risk
ILMN_1715214	PTPN7	Protein tyrosine phosphatase, non-receptor type 7	1q32.1	5778	GeneID:5778	6.74686	6.21775	-0.529112	-6.32037	8.29727e-10	8.82326e-07	down high- vs. low-risk
ILMN_1687533	SEMA4D	Sema domain, immunoglobulin domain (Ig), transmembrane domain (TM) and short cytoplasmic domain, (semaphorin) 4D	9q22.2	10507	GeneID:10507	8.90955	8.37211	-0.537439	-6.32286	8.17827e-10	8.82326e-07	down high- vs. low-risk
ILMN_1778599	SP140	SP140 nuclear body protein	2q37.1	11262	GeneID:11262	6.93811	6.3312	-0.606913	-6.34838	7.05433e-10	8.82326e-07	down high- vs. low-risk
ILMN_1806725	PDCD1	Programmed cell death 1	2q37.3	5133	GeneID:5133	5.94735	5.5851	-0.362246	-6.36193	6.5206e-10	8.82326e-07	down high- vs. low-risk
ILMN_1766275	PIK3CD	Phosphoinositide-3-kinase, catalytic, delta polypeptide	1p36.22	5293	GeneID:5293	6.91766	6.46993	-0.447732	-6.37038	6.20802e-10	8.82326e-07	down high- vs. low-risk
ILMN_1772370	ARHGEF1	Rho guanine nucleotide exchange factor (GEF) 1	19q13.2	9138	GeneID:9138	6.80716	6.46934	-0.33782	-6.4332	4.3021e-10	7.03479e-07	down high- vs. low-risk
ILMN_1795089	FLJ21438	RAS protein activator like 3	19p13.12	64926	GeneID:64926	8.43819	7.69478	-0.743407	-6.48778	3.12142e-10	6.2384e-07	down high- vs. low-risk
ILMN_1749591	ITGAL	Integrin, alpha L (antigen CD11A (p180), lymphocyte function-associated antigen 1; alpha polypeptide)	16p11.2	3683	GeneID:3683	7.13422	6.49653	-0.637688	-6.51018	2.73487e-10	6.14907e-07	down high- vs. low-risk
ILMN_1798204	IL21R	Interleukin 21 receptor	16p12.1	50615	GeneID:50615	6.59937	6.11101	-0.488354	-6.5278	2.46406e-10	6.14907e-07	down high- vs. low-risk
ILMN_1808395	ACAP1	ArfGAP with coiled-coil, ankyrin repeat and PH domains 1	17p13.1	9744	GeneID:9744	7.14101	6.47932	-0.661686	-6.56654	1.958e-10	5.86981e-07	down high- vs. low-risk
ILMN_2145280	DEF6	Differentially expressed in FDCP 6 homolog (mouse)	6p21.31	50619	GeneID:50619	7.34913	6.90449	-0.444638	-6.57122	1.90414e-10	5.86981e-07	down high- vs. low-risk
ILMN_2330966	PTK2B	PTK2B protein tyrosine kinase 2 beta	8p21.2	2185	GeneID:2185	6.42369	6.08572	-0.337963	-6.62156	1.41004e-10	5.86981e-07	down high- vs. low-risk
ILMN_1765109	TNFRSF25	Tumor necrosis factor receptor superfamily, member 25	1p36.31	8718	GeneID:8718	7.75512	7.15025	-0.604868	-6.65675	1.14187e-10	5.86981e-07	down high- vs. low-risk
ILMN_1729987	SRC	V-src sarcoma (Schmidt-Ruppin A-2) viral oncogene homolog (avian)	20q11.23	6714	GeneID:6714	8.682	8.1662	-0.515809	-7.26074	2.6979e-12	4.85277e-08	down high- vs. low-risk

## Sheet: Table S3
Supplementary Table 3: Ontology analysis of the 480 genes differentially expressed between the “low-risk” and “high-risk” TNBC samples as defined by our 13-gene classifier in the Metabric data set (N=335)
		Genes overexpressed in high- vs. low-risk				Genes underexpressed in high- vs. low-risk
GO:BP Terms ID	GO:BP Terms	N	Gene	p-value	q-value	N	Gene	p-value	q-value
GO:0006414	translational elongation	19	RPLP0,RPL12,EEF1G,RPL22,RPS17,RPL30,RPS15A,EEF1B2,RPL7,RPS4X,RPL35A,RPL17,RPL10A,RPS2,TCEA1,RPL15,RPS5,RPL21,RPL26	1.44665e-24	3.9349e-22
GO:0006415	translational termination	16	RPLP0,RPL12,RPL22,RPS17,RPL30,RPS15A,RPL7,RPS4X,RPL35A,RPL17,RPL10A,RPS2,RPL15,RPS5,RPL21,RPL26	5.65695e-21	7.69345e-19
GO:0006614	SRP-dependent cotranslational protein targeting to membrane	16	RPLP0,RPL12,RPL22,RPS17,RPL30,RPS15A,RPL7,RPS4X,RPL35A,RPL17,RPL10A,RPS2,RPL15,RPS5,RPL21,RPL26	1.64004e-19	1.48697e-17
GO:0019083	viral transcription	16	RPLP0,RPL12,RPL22,RPS17,RPL30,RPS15A,RPL7,RPS4X,RPL35A,RPL17,RPL10A,RPS2,RPL15,RPS5,RPL21,RPL26	2.2901e-19	1.55727e-17
GO:0000184	nuclear-transcribed mRNA catabolic process, nonsense-mediated decay	16	RPLP0,RPL12,RPL22,RPS17,RPL30,RPS15A,RPL7,RPS4X,RPL35A,RPL17,RPL10A,RPS2,RPL15,RPS5,RPL21,RPL26	1.10271e-18	5.99872e-17
GO:0019058	viral life cycle	17	RPLP0,RPL12,RPL22,RPS17,RPL30,RPS15A,RPL7,RPS4X,RPL35A,RPL17,RPL10A,RPS2,RPL15,RPS5,CHMP5,RPL21,RPL26	2.03617e-18	9.23063e-17
GO:0006413	translational initiation	16	RPLP0,RPL12,RPL22,RPS17,RPL30,RPS15A,RPL7,RPS4X,RPL35A,RPL17,RPL10A,RPS2,RPL15,RPS5,RPL21,RPL26	1.50601e-17	5.85193e-16
GO:0006412	translation	18	RPLP0,RPL12,EEF1G,RPL22,RPS17,RPL30,RPS15A,EEF1B2,RPL7,RPS4X,RPL35A,RPL17,RPL10A,RPS2,RPL15,RPS5,RPL21,RPL26	1.23633e-15	4.20352e-14
GO:0002181	cytoplasmic translation	7	RPL22,RPL30,RPL7,RPL35A,RPL17,RPL15,RPL26	5.99423e-13	1.81159e-11
GO:0010467	gene expression	26	RPLP0,RPL12,EEF1G,RPL22,RPS17,RPL30,RPS15A,EEF1B2,HNRNPA0,RPL7,RPS4X,RPL35A,TSNAX,RPL17,RPL10A,CCNC,RPS2,TCEA1,POP5,RPL15,PRDX2,RPS5,RPL21,SF3B6,RPL26,HSPA8	8.72436e-12	2.37303e-10
GO:0000028	ribosomal small subunit assembly	2	RPS17,RPS5	0.00010568	0.00221115
GO:0015986	ATP synthesis coupled proton transport	2	ATP5J,ATP5F1	0.00010568	0.00221115
GO:0016601	Rac protein signal transduction	2	BRK1,PTPLAD1	0.00018692	0.00363159
GO:0001708	cell fate specification	2	CTNNB1,ITGB1	0.000258739	0.00450412
GO:0006364	rRNA processing	4	RPS17,RPL7,RPL35A,RPL26	0.000264948	0.00450412
GO:0022904	respiratory electron transport chain	4	UQCRH,ATP5J,NDUFB3,ATP5F1	0.000357554	0.00572087
GO:0006892	post-Golgi vesicle-mediated transport	3	HSPA8,AP1S1,APP	0.000402395	0.00608064
GO:0000302	response to reactive oxygen species	2	PRDX3,PRDX2	0.0016308	0.0148342
GO:0010043	response to zinc ion	2	KRT14,CA2	0.0019006	0.0148342
GO:0007368	determination of left/right symmetry	2	DYNC2LI1,NME7	0.00287097	0.0148342
GO:0008542	visual learning	2	ITGB1,APP	0.00287097	0.0148342
GO:0021762	substantia nigra development	2	ATP5J,ATP5F1	0.00287097	0.0148342
GO:0090502	RNA phosphodiester bond hydrolysis, endonucleolytic	2	TSNAX,POP5	0.00325076	0.0152574
GO:0006979	response to oxidative stress	3	PRDX3,PRDX2,GATM	0.00473416	0.018638
GO:1902600	hydrogen ion transmembrane transport	2	UQCRH,TMCO3	0.00507063	0.018638
GO:0006996	organelle organization	5	DYNC2LI1,TCTN3,MRPL39,MRPL33,ARF4	0.00998228	0.026883
GO:0007005	mitochondrion organization	2	PRDX3,CAV2	0.0110748	0.0289649
GO:0030855	epithelial cell differentiation	2	KRT14,EHF	0.0110748	0.0289649
GO:0000082	G1/S transition of mitotic cell cycle	3	WEE1,CDK6,ITGB1	0.0158031	0.0360555
GO:0007219	Notch signaling pathway	3	CCNC,CDK6,APP	0.0179569	0.0387641
GO:0001822	kidney development	2	TMED10,CA2	0.019368	0.0403447
GO:0018279	protein N-linked glycosylation via asparagine	3	OSTC,CNIH1,TMED10	0.0259446	0.0490064
GO:0006888	ER to Golgi vesicle-mediated transport	2	CNIH1,TMED10	0.0274959	0.0507278
GO:0007420	brain development	3	NME7,ARF4,CD9	0.0308836	0.0552653
GO:0000398	mRNA splicing, via spliceosome	3	HNRNPA0,SF3B6,HSPA8	0.0380802	0.0655558
GO:0001701	in utero embryonic development	3	BRK1,CTNNB1,ITGB1	0.0461617	0.0760969
GO:0016032	viral process	20	RPLP0,RPL12,RPL22,RPS17,RPL30,RPS15A,RPL7,RPS4X,RPL35A,RPL17,RPL10A,RPS2,TCEA1,RPL15,RPS5,CHMP5,RPL21,RPL26,HSPA8,AP1S1	2.00458e-11	4.95677e-10	20	VCAM1,DOCK2,LYN,APOBEC3G,SYK,PSMB8,CFLAR,SEPT6,MICB,NUP210,IL2RB,PSMB10,BIN1,ELMO1,CD4,CD247,FYN,STAT2,STAT1,SRC	0.00017622	0.00183719
GO:0002576	platelet degranulation	2	CD9,APP	0.0146508	0.0340599	3	PLEK,SERPING1,LYN	0.0425255	0.0809344
GO:0008284	positive regulation of cell proliferation	6	RPS15A,TSC22D1,PRDX3,BRK1,RPS4X,ITGB1	0.023165	0.0446871	12	LYN,TNFSF13B,CD86,SLAMF1,RAC2,HCLS1,ACER3,IFNG,TCIRG1,CXCR3,PTPN6,PTK2B	0.0305586	0.0656741
GO:0007160	cell-matrix adhesion	2	CTNNB1,ITGB1	0.022926	0.044542	4	VCAM1,PARVG,ITGB7,ITGAL	0.0199504	0.0536672
GO:0019886	antigen processing and presentation of exogenous peptide antigen via MHC class II	2	DYNC2LI1,AP1S1	0.0188073	0.0399654	5	HLA-DMB,HLA-DOA,HLA-DMA,CD74,HLA-DOB	0.00324593	0.0174781
GO:0009615	response to virus	4	EEF1G,RPS15A,CDK6,AP1S1	0.000640281	0.00916613	8	OASL,FGR,OAS2,PIM2,ISG20,IRF7,CCL5,IFNG	7.07526e-05	0.000806402
GO:0018108	peptidyl-tyrosine phosphorylation	2	WEE1,NPTN	0.0438822	0.0736787	8	LYN,FGR,PRKCD,ZAP70,FYN,PTPN6,PTK2B,SRC	0.000190591	0.00194562
GO:0007411	axon guidance					13	MMP9,LYN,SEMA4A,RAC2,PSMB8,CD72,IL2RB,PSMB10,FYN,LAT,SEMA4D,RASAL3,SRC	0.049605	0.0896917
GO:0001934	positive regulation of protein phosphorylation					4	MMP9,CD40,STK4,SEMA4D	0.0484827	0.0885625
GO:0006521	regulation of cellular amino acid metabolic process					2	PSMB8,PSMB10	0.0471788	0.0882351
GO:0006887	exocytosis					3	TNFAIP2,CCL5,MYO1G	0.0458271	0.0860355
GO:0009408	response to heat					2	TRPV2,MICB	0.0426144	0.0809344
GO:0006906	vesicle fusion					2	LRMP,DYSF	0.0404199	0.0784605
GO:0019985	translesion synthesis					2	UBE2L6,UBA7	0.0404199	0.0784605
GO:0071230	cellular response to amino acid stimulus					2	CYBA,CCL5	0.0404199	0.0784605
GO:0001755	neural crest cell migration					2	SEMA4A,SEMA4D	0.0382844	0.0762575
GO:0010976	positive regulation of neuron projection development					3	LYN,FYN,PTK2B	0.0363403	0.0735815
GO:0006139	nucleobase-containing compound metabolic process					2	UPP1,OAS2	0.0362083	0.0735815
GO:0030307	positive regulation of cell growth					3	CYBA,CD38,PTK2B	0.034881	0.0712153
GO:0071333	cellular response to glucose stimulus					2	UCP2,CYBA	0.0341921	0.070101
GO:0008015	blood circulation					2	SERPING1,STAT1	0.0322361	0.0680849
GO:0030838	positive regulation of actin filament polymerization					2	CCR7,PTK2B	0.0322361	0.0680849
GO:0007584	response to nutrient					3	C2,CD3E,LTA	0.0320665	0.0680849
GO:0000186	activation of MAPKK activity					7	PSMB8,IL2RB,PSMB10,STK4,FYN,LAT,RASAL3	0.0320621	0.0680849
GO:0007077	mitotic nuclear envelope disassembly					2	PRKCB,NUP210	0.0303406	0.065493
GO:0071560	cellular response to transforming growth factor beta stimulus					2	CCL5,FYN	0.0303406	0.065493
GO:0002244	hematopoietic progenitor cell differentiation					3	PLEK,SAMD9L,TNFRSF13B	0.0293903	0.065493
GO:0001525	angiogenesis					7	TNFAIP2,TYMP,SEMA4A,SYK,WARS,CXCR3,PTK2B	0.0286298	0.064648
GO:0071260	cellular response to mechanical stimulus					3	CYBA,IRF1,CD40	0.0268517	0.0612654
GO:0006904	vesicle docking involved in exocytosis					2	PLEK,RAB37	0.0267321	0.0612654
GO:0018105	peptidyl-serine phosphorylation					4	SYK,STK4,MAST3,MAP4K1	0.0251639	0.0598559
GO:0006977	DNA damage response, signal transduction by p53 class mediator resulting in cell cycle arrest					3	RBM38,PSMB8,PSMB10	0.0221824	0.0560278
GO:0010811	positive regulation of cell-substrate adhesion					2	EGFL6,SPOCK2	0.0217782	0.0552918
GO:0016485	protein processing					3	GZMH,GZMB,RHBDF2	0.0210991	0.0538466
GO:0022008	neurogenesis					2	BCL11B,TACC3	0.0202496	0.0536672
GO:0030036	actin cytoskeleton organization					5	DOCK2,FGD2,FGD3,ELMO1,CORO1A	0.0199602	0.0536672
GO:0007015	actin filament organization					3	RAC2,WAS,CORO1A	0.0190315	0.0529854
GO:0007257	activation of JUN kinase activity					2	SYK,MAP4K1	0.0187823	0.0525906
GO:2001237	negative regulation of extrinsic apoptotic signaling pathway					2	CFLAR,SRC	0.0187823	0.0525906
GO:0071526	semaphorin-plexin signaling pathway					2	SEMA4A,SEMA4D	0.0173763	0.0509844
GO:0016525	negative regulation of angiogenesis					3	SEMA4A,CXCR3,STAT1	0.0161743	0.0477433
GO:0001890	placenta development					2	ASCL2,ADA	0.0160314	0.0476084
GO:0003333	amino acid transmembrane transport					2	SLC7A7,SLC38A10	0.0160314	0.0476084
GO:0071902	positive regulation of protein serine/threonine kinase activity					2	STK4,SRC	0.0160314	0.0476084
GO:0007202	activation of phospholipase C activity					3	PLCB2,PRKCD,ITK	0.0152858	0.046878
GO:0090002	establishment of protein localization to plasma membrane					2	TSPAN33,FLOT2	0.0147473	0.046878
GO:0015992	proton transport					3	UCP2,SLC2A6,TCIRG1	0.0144287	0.0465136
GO:0007565	female pregnancy					4	LGALS9,UCP2,CD38,IDO1	0.0141794	0.0460125
GO:0001937	negative regulation of endothelial cell proliferation					2	CXCR3,STAT1	0.0135239	0.044178
GO:0006661	phosphatidylinositol biosynthetic process					3	PLCG2,INPP5D,PIK3CD	0.0128075	0.0429284
GO:0002230	positive regulation of defense response to virus by host					5	APOBEC3G,SLC1A3,AIM2,STAT2,GMIP	0.0111084	0.0409257
GO:0010628	positive regulation of gene expression					8	LGALS9,PRDM1,IL7R,CCL5,IFNG,MSN,CD3E,PIK3CD	0.0107541	0.0400721
GO:0010634	positive regulation of epithelial cell migration					2	IFNG,SRC	0.0102132	0.0400721
GO:0008285	negative regulation of cell proliferation					12	RBM38,LYN,BCL11B,PIM2,CD37,TSPAN32,IRF1,RASSF5,STK4,WARS,PTPN6,PTK2B	0.00959465	0.0400721
GO:0023014	signal transduction by protein phosphorylation					3	LYN,STK4,STK10	0.00927791	0.0391912
GO:0071346	cellular response to interferon-gamma					3	LGALS9,GBP5,CCL5	0.00927791	0.0391912
GO:0006206	pyrimidine nucleobase metabolic process					2	UPP1,TYMP	0.00922784	0.0391912
GO:0006816	calcium ion transport					4	CCL5,PRKCB,FYN,CORO1A	0.00916757	0.0391912
GO:0030900	forebrain development					3	FYN,IKZF1,SRC	0.00865832	0.0378802
GO:0030041	actin filament polymerization					2	HCLS1,WAS	0.00830059	0.0366423
GO:0030449	regulation of complement activation					2	CFB,C2	0.00830059	0.0366423
GO:0007568	aging					6	SERPING1,UCP2,CD86,TNFRSF1B,CCL5,ADA	0.0081764	0.0366423
GO:1902042	negative regulation of extrinsic apoptotic signaling pathway via death domain receptors					2	TNFAIP3,CFLAR	0.0074307	0.0337134
GO:2001243	negative regulation of intrinsic apoptotic signaling pathway					2	MMP9,SRC	0.00661733	0.0303037
GO:0007346	regulation of mitotic cell cycle					4	PIM2,STK4,MAP4K1,STK10	0.00623443	0.0288195
GO:0007265	Ras protein signal transduction					9	GRAP,PSMB8,RASGRP2,IL2RB,PSMB10,FYN,LAT,RASAL3,SRC	0.00560956	0.026178
GO:0002092	positive regulation of receptor internalization					2	PLCG2,SYK	0.0051564	0.0242946
GO:0008361	regulation of cell size					2	IL7R,MSN	0.0051564	0.0242946
GO:0010499	proteasomal ubiquitin-independent protein catabolic process					2	PSMB8,PSMB10	0.0051564	0.0242946
GO:0009725	response to hormone					3	LYN,HCLS1,PTK2B	0.00506723	0.0242946
GO:0030154	cell differentiation					14	EGFL6,TNFAIP2,RBM38,FGR,TYMP,FCRLA,SYK,MAL,FAM65B,ZAP70,FYN,PTPN6,PTK2B,SRC	0.00490433	0.0240312
GO:0030218	erythrocyte differentiation					3	LYN,HCLS1,IKZF1	0.00465423	0.0230361
GO:0016337	single organismal cell-cell adhesion					5	VCAM1,ICAM3,CYFIP2,CD2,ICOS	0.00403557	0.0201778
GO:0012501	programmed cell death					7	BIRC3,PSMB8,GZMB,CFLAR,MLKL,PSMB10,PRKCD	0.00397533	0.0200816
GO:0006401	RNA catabolic process					2	OAS2,ISG20	0.00390932	0.0199538
GO:0000165	MAPK cascade					10	PSMB8,CCL5,IL2RB,PSMB10,STK4,FYN,LAT,MAP4K1,RASAL3,PTK2B	0.00356695	0.0183979
GO:0090382	phagosome maturation					3	NCF1,CYBA,TCIRG1	0.00355227	0.0183979
GO:0072659	protein localization to plasma membrane					4	SKAP1,FYB,RAB37,PLEKHF1	0.00352277	0.0183979
GO:0010939	regulation of necrotic cell death					2	BIRC3,CFLAR	0.00336289	0.017911
GO:0007204	positive regulation of cytosolic calcium ion concentration					6	CD52,CD38,CXCL13,CCR7,CXCR3,PTK2B	0.00297372	0.0161902
GO:0010629	negative regulation of gene expression					6	LGALS9,HAVCR2,FLOT2,IFNG,FYN,CD3E	0.00297372	0.0161902
GO:0006801	superoxide metabolic process					2	NCF1,CYBA	0.00286599	0.0159584
GO:0008543	fibroblast growth factor receptor signaling pathway					11	CD86,PSMB8,CD19,IL2RB,PSMB10,PRKCD,FYN,LAT,PIK3CD,RASAL3,SRC	0.00269974	0.0152054
GO:0010508	positive regulation of autophagy					3	PIM2,PLEKHF1,IFNG	0.00264245	0.0150559
GO:0090630	activation of GTPase activity					3	CXCL13,CCR7,PTK2B	0.0023788	0.0137131
GO:0097191	extrinsic apoptotic signaling pathway					4	CD27,TNFRSF1B,CFLAR,IFNG	0.00227022	0.013243
GO:0007267	cell-cell signaling					10	C1QA,CD86,GRAP,LTB,CXCL13,CXCL9,SH2D1A,CCL5,TSPAN32,LTA	0.00226368	0.013243
GO:0007173	epidermal growth factor receptor signaling pathway					12	CD86,PSMB8,CD19,IL2RB,PSMB10,PRKCD,FYN,LAT,PIK3CD,RASAL3,PTK2B,SRC	0.00209734	0.0125329
GO:0001556	oocyte maturation					2	REC8,PTK2B	0.00201455	0.0121868
GO:0001829	trophectodermal cell differentiation					2	ADA,EOMES	0.00201455	0.0121868
GO:0031098	stress-activated protein kinase signaling cascade					3	STK4,MAP4K1,STK10	0.00190682	0.0118271
GO:0007259	JAK-STAT cascade					3	STAT4,STAT2,STAT1	0.0016971	0.0106613
GO:0007049	cell cycle					9	EGFL6,RBM38,RASSF2,RASSF4,PYHIN1,PRKCD,IKZF1,STK10,SRC	0.00168024	0.0106613
GO:1902043	positive regulation of extrinsic apoptotic signaling pathway via death domain receptors					2	MAL,STK4	0.00165657	0.0106613
GO:2000249	regulation of actin cytoskeleton reorganization					2	GMFG,PTK2B	0.00165657	0.0106613
GO:0001878	response to yeast					2	NCF1,CD86	0.00134126	0.00888132
GO:0002407	dendritic cell chemotaxis					2	CCL5,CCR7	0.00134126	0.00888132
GO:0001666	response to hypoxia					8	ASCL2,UCP2,CD38,TACC3,ADA,PRKCB,LTA,PTK2B	0.00133058	0.00888132
GO:0010803	regulation of tumor necrosis factor-mediated signaling pathway					3	BIRC3,TNFAIP3,SYK	0.00132663	0.00888132
GO:0007157	heterophilic cell-cell adhesion via plasma membrane cell adhesion molecules					4	AMICA1,VCAM1,CD6,ITGAL	0.00114855	0.00803985
GO:0071498	cellular response to fluid shear stress					2	PTK2B,SRC	0.00106658	0.00757429
GO:2000484	positive regulation of interleukin-8 secretion					2	LGALS9,CD2	0.00106658	0.00757429
GO:0030183	B cell differentiation					5	VCAM1,CD79A,PLCG2,LYL1,IKZF1	0.000810938	0.00593074
GO:0019722	calcium-mediated signaling					4	PLCG2,LAT2,CXCR3,LAT	0.000775716	0.0057591
GO:0030155	regulation of cell adhesion					4	CYTH4,CYTIP,CYTH1,PTK2B	0.000775716	0.0057591
GO:0001816	cytokine production					3	CD4,ITK,PIK3CD	0.000652604	0.0049965
GO:0030593	neutrophil chemotaxis					5	AMICA1,SYK,CCL5,IFNG,PIK3CD	0.00063727	0.00495655
GO:0002544	chronic inflammatory response					2	CXCL13,CCL5	0.000630319	0.00495655
GO:0030833	regulation of actin filament polymerization					2	HCLS1,CORO1A	0.000630319	0.00495655
GO:0001954	positive regulation of cell-matrix adhesion					3	CCR7,PLEKHA2,PTK2B	0.000468624	0.00382709
GO:0002376	immune system process					3	FAIM3,LRMP,IDO1	0.000468624	0.00382709
GO:0019882	antigen processing and presentation					3	CD74,CD8A,IFNG	0.000468624	0.00382709
GO:0030335	positive regulation of cell migration					9	LYN,FGR,SEMA4A,CCL5,FERMT3,CORO1A,SEMA4D,PIK3CD,PTK2B	0.000467394	0.00382709
GO:0010820	positive regulation of T cell chemotaxis					2	CXCL13,CCL5	0.000463967	0.00382709
GO:2000406	positive regulation of T cell migration					2	TNFRSF14,CCL5	0.000463967	0.00382709
GO:0006909	phagocytosis					4	IRF8,ELMO1,UNC13D,CORO1A	0.000395695	0.00359057
GO:0097300	programmed necrotic cell death					3	BIRC3,CFLAR,MLKL	0.000392096	0.00359057
GO:0071345	cellular response to cytokine stimulus					3	CD86,HCLS1,CCR7	0.000324929	0.00306183
GO:0071222	cellular response to lipopolysaccharide					7	IRF8,CD86,TNFRSF1B,TNFAIP3,CCL5,IFNG,CD40	0.000271928	0.00261264
GO:0007162	negative regulation of cell adhesion					4	ADAMDEC1,LPXN,SIPA1,SEMA4D	0.000269579	0.00261264
GO:0008283	cell proliferation					15	NCF1,TNFSF13B,PIM2,CD74,ISG20,LAMP3,STAT4,SYK,TACC3,SIPA1,CD5,BIN1,MAP4K1,PTPN6,ARHGEF1	0.000224613	0.00224613
GO:1901741	positive regulation of myoblast fusion					3	CD53,CXCL9,IL4R	0.000172624	0.00183719
GO:0030101	natural killer cell activation					3	CD2,PIK3CD,IL21R	0.000105334	0.00114697
GO:0007010	cytoskeleton organization					8	FGD2,TSPAN32,SIPA1,FGD3,MAST3,ARHGAP4,MICAL1,PTK2B	7.59774e-05	0.000846112
GO:0006928	movement of cell or subcellular component					7	CXCR5,IFNG,ELMO1,MSN,CXCR3,CORO1A,ITGAL	7.07659e-05	0.000806402
GO:0071375	cellular response to peptide hormone stimulus					4	LYN,FGR,FYN,SRC	5.37072e-05	0.000641867
GO:0001779	natural killer cell differentiation					3	ZNF683,IKZF1,PIK3CD	4.30032e-05	0.00052679
GO:0006959	humoral immune response					6	POU2AF1,SH2D1A,PSMB10,IFNG,LTA,PDCD1	3.61524e-05	0.000454222
GO:0007155	cell adhesion					19	VCAM1,LPXN,ICAM3,IL32,SIGLEC10,LGALS3BP,ITGAX,SELL,CD96,CD72,FLOT2,CD4,PSTPIP1,CXCR3,ITGB7,SEMA4D,ITGAL,PTK2B,SRC	3.52057e-05	0.000453968
GO:0002504	antigen processing and presentation of peptide or polysaccharide antigen via MHC class II					3	HLA-DMB,HLA-DMA,HLA-DOB	3.01559e-05	0.000399362
GO:0002223	stimulatory C-type lectin receptor signaling pathway					9	LYN,ICAM3,PLCG2,SYK,PSMB8,PSMB10,PRKCD,FYN,SRC	2.41839e-05	0.00032917
GO:0001782	B cell homeostasis					4	LYN,TNFSF13B,TNFRSF13B,PIK3CD	2.26751e-05	0.000317452
GO:0006935	chemotaxis					9	LGALS9,DOCK2,TYMP,CXCR5,CXCL9,CCL5,CXCR6,CCR7,CXCR3	2.08602e-05	0.000300633
GO:0090023	positive regulation of neutrophil chemotaxis					4	CD74,SELL,RAC2,CCR7	1.77564e-05	0.000263656
GO:0008360	regulation of cell shape					10	ARHGAP15,FGR,SEMA4A,FGD2,FGD3,MSN,FYN,CORO1A,SEMA4D,PTK2B	1.27585e-05	0.000195365
GO:0006958	complement activation, classical pathway					5	C1QA,C1QB,C1QC,SERPING1,C2	1.09418e-05	0.00017295
GO:0006468	protein phosphorylation					22	CDK12,BRSK1,CAMK1G,LYN,FGR,GMFG,FYB,PIM2,RASSF2,HCST,STAT4,SYK,MLKL,PRKCB,PRKCD,ZAP70,STK4,FYN,MAP4K1,STK10,PIK3CD,PTK2B	9.77782e-06	0.000159704
GO:0007264	small GTPase mediated signal transduction					25	NCF1,ARHGAP15,DOCK2,DOCK10,CYBA,SH2D3C,DOCK8,FGD2,RAC2,PSMB8,CYFIP2,ARHGAP30,RASGRP2,FGD3,IL2RB,PSMB10,ARHGAP25,ARHGAP4,FYN,ARHGAP9,WAS,LAT,GMIP,RASAL3,SRC	8.97087e-06	0.000151577
GO:0006956	complement activation					5	CFB,C1QA,C1QB,C1QC,C2	3.8265e-06	6.69637e-05
GO:0009967	positive regulation of signal transduction					7	SKAP1,SH2D3C,GRAP,SH2D1A,SLA,HSH2D,ARHGAP4	3.59779e-06	6.52932e-05
GO:0014068	positive regulation of phosphatidylinositol 3-kinase signaling					7	FGR,HCST,CCL5,HCLS1,FYN,PTPN6,SEMA4D	3.59779e-06	6.52932e-05
GO:0030217	T cell differentiation					6	IL7R,CD3D,CD4,ZAP70,IKZF1,PIK3CD	6.51021e-07	1.276e-05
GO:0002474	antigen processing and presentation of peptide antigen via MHC class I					10	NCF1,HLA-H,HLA-F,CYBA,TAP2,PSMB8,TAP1,PSMB10,HLA-E,TAPBP	5.43332e-07	1.1093e-05
GO:0007169	transmembrane receptor protein tyrosine kinase signaling pathway					10	LYN,FGR,SYK,CD8A,CD4,ZAP70,FYN,CD3E,CD7,ITK	4.40123e-07	9.37654e-06
GO:0019835	cytolysis					5	GZMA,GZMH,GZMB,MICB,PRF1	3.91258e-07	8.71439e-06
GO:0002479	antigen processing and presentation of exogenous peptide antigen via MHC class I, TAP-dependent					9	NCF1,HLA-F,CYBA,TAP2,PSMB8,TAP1,PSMB10,HLA-E,TAPBP	3.53092e-07	8.23882e-06
GO:0030168	platelet activation					15	PLEK,SERPING1,LYN,APBB1IP,DGKA,PLCG2,RAC2,SYK,RASGRP2,PRKCB,CD40,PRKCD,FYN,LAT,SRC	3.05463e-07	7.48385e-06
GO:0006461	protein complex assembly					11	SLC7A7,LPXN,CD74,NFS1,IL2RB,CD40,CD3G,WAS,CD3E,TAPBP,PTK2B	2.76405e-07	7.12833e-06
GO:0007159	leukocyte cell-cell adhesion					6	VCAM1,SYK,CCL5,MSN,FERMT3,ITGAL	1.84136e-07	5.01259e-06
GO:0030889	negative regulation of B cell proliferation					5	PRDM1,LYN,TNFRSF13B,CTLA4,INPP5D	1.83421e-07	5.01259e-06
GO:0030890	positive regulation of B cell proliferation					7	TNFSF13B,CD74,CD38,ADA,TNFRSF4,CD40,SASH3	1.11384e-07	3.41112e-06
GO:0097190	apoptotic signaling pathway					12	CD38,FGD2,TNFRSF1B,TNFRSF14,CFLAR,CD5,FGD3,TNFRSF4,CD40,ARHGAP4,CD3E,TNFRSF25	8.4946e-08	2.7749e-06
GO:0006915	apoptotic process					30	GZMA,XAF1,GZMH,PLEKHF1,TNFAIP3,AIM2,PSMB8,GZMB,CYFIP2,CFLAR,PRKCB,CD2,PRF1,PSMB10,IRF1,MAL,IFNG,ELMO1,RASSF5,PRKCD,STK4,CXCR3,LTA,STAT1,INPP5D,PTPN6,TIAF1,PDCD1,PTK2B,TNFRSF25	1.23547e-08	4.32415e-07
GO:0007229	integrin-mediated signaling pathway					11	PLEK,FGR,ITGAX,SYK,TSPAN32,FERMT3,LAT,ITGB7,ITGAL,PTK2B,SRC	9.21732e-09	3.47422e-07
GO:0006952	defense response					10	CD48,IL32,CD74,CXCL9,TAP1,HCP5,PTPRCAP,WAS,TAPBP,SP140	4.13865e-09	1.68995e-07
GO:0001771	immunological synapse formation					5	DOCK2,DOCK8,PRF1,CD6,CORO1A	3.42563e-09	1.52596e-07
GO:0006954	inflammatory response					24	NCF1,LGALS9,CYBA,CD27,TNFRSF1B,APOL3,TNFAIP3,CXCL13,GBP5,CXCL9,TNFRSF14,AIM2,CCL5,CXCR6,CCR7,TNFRSF4,CD40,PSTPIP1,IL18RAP,CXCR3,LAT,PIK3CD,ITGAL,TNFRSF25	7.24556e-10	3.55033e-08
GO:0007596	blood coagulation					28	AMICA1,SLC7A7,PLEK,SERPING1,LYN,APBB1IP,FGR,SLC16A3,CD48,DGKA,ITGAX,PLCG2,DOCK8,SELL,RAC2,SYK,RASGRP2,PRKCB,CD2,IRF1,PRKCD,FYN,WAS,LAT,INPP5D,PTPN6,ITGAL,SRC	6.74609e-10	3.55033e-08
GO:0007166	cell surface receptor signaling pathway					25	IGSF6,IL7R,ADAP1,BIRC3,CD53,CD27,TNFRSF13B,CD37,TNFAIP3,CD3D,CXCL13,TNFRSF14,CD19,TSPAN32,CD8A,CD2,IFNG,CD4,CD3G,IL18RAP,CXCR3,CD3E,LAG3,PTK2B,TNFRSF25	2.48642e-12	1.52293e-10
GO:0016064	immunoglobulin mediated immune response					7	HLA-DMA,CD27,CD74,IRF7,PRKCD,INPP5D,IL4R	2.03255e-12	1.42279e-10
GO:0006968	cellular defense response					13	NCF1,FAIM3,LGALS3BP,CXCL9,SH2D1A,CD19,KIR2DL4,GNLY,TNFRSF4,PRF1,TCIRG1,ITK,PTK2B	5.74148e-13	4.68887e-11
GO:0007165	signal transduction					55	ARHGAP15,LILRB4,LYN,BCL11B,HLA-DOA,LPXN,IL7R,TNFSF13B,APBB1IP,CD48,CD53,FYB,LGALS3BP,CD74,CD38,SPOCK2,LTB,APOL3,SLAMF1,RAC2,CXCL9,RASSF4,KIR2DL4,CD79B,SIPA1,ARHGAP30,RASGRP2,CD72,PRKCB,HLA-DOB,IL2RB,ARHGAP25,ZNF831,CD4,PSTPIP1,PRKCD,STK4,ARHGAP4,MICAL1,STAT2,ARHGAP9,LTA,STAT1,LAT,SH3BP1,INPP5D,ITK,IL4R,PDCD1,PIK3CD,RASAL3,ITGAL,PTK2B,TNFRSF25,SRC	2.70615e-14	2.65203e-12
GO:0031124	mRNA 3-end processing					246	CFB,CD52,C1QA,NCF1,LGALS9,C1QB,SLC15A3,CDK12,ARHGAP15,HELZ2,UPP1,C1QC,GBP1,AMICA1,VCAM1,MMP9,OASL,HAVCR2,SLC7A7,PLEK,PRDM1,RBM38,IRF8,LILRB4,HLA-F,ASCL2,BRSK1,DOCK2,HLA-DMB,SERPING1,DOCK10,LYN,BCL11B,SAMD9L,LPXN,UCP2,IL7R,TNFSF13B,APBB1IP,ICAM3,CD86,FGR,CYBA,SLC16A3,GMFG,OAS2,UBD,FAIM3,ADAP1,TGM2,CD48,ABCD1,BIRC3,SKAP1,GZMA,TAP2,FYB,HLA-DMA,SLC2A6,PIM2,UBE2L6,GPSM3,CD27,GBP2,TSPAN33,RASSF2,CD79A,…	1.93644e-14	2.37214e-12
GO:0019221	cytokine-mediated signaling pathway					27	GBP1,VCAM1,OASL,IRF8,HLA-F,IL7R,OAS2,UBE2L6,GBP2,IL10RA,ISG20,XAF1,IRF7,STAT4,PSMB8,UBA7,NUP210,IL2RB,IRF1,IFNG,HLA-E,PRKCD,IFI35,STAT2,STAT1,PTPN6,IL4R	6.31253e-15	1.03105e-12
GO:0002250	adaptive immune response					28	LILRB4,LYN,CD86,SKAP1,TAP2,CD79A,TNFRSF13B,LAX1,LAMP3,SYK,CD79B,TAP1,PRKCB,IFNG,HLA-E,CD4,ZAP70,BTN3A1,FYN,LAT2,EOMES,CTLA4,LAT,LIME1,CD7,ITK,PIK3CD,PTK2B	3.79428e-25	9.296e-23
GO:0006955	immune response					54	ADAMDEC1,IGSF6,C1QC,HLA-H,IRF8,HLA-F,HLA-DMB,HLA-DOA,IL7R,TNFSF13B,CD86,OAS2,VPREB3,GZMA,FYB,IL32,HLA-DMA,CD27,GBP2,CD74,LAX1,LTB,CD96,TNFRSF1B,GZMH,CXCR5,CXCL13,CXCL9,TNFRSF14,AIM2,CCL5,KIR2DL3,CST7,CD79B,MICB,CD8A,CCR7,TNFRSF4,HLA-DOB,ICOS,HLA-E,CD4,ZAP70,CTSW,IL18RAP,WAS,LTA,CTLA4,LAT,CD7,IL4R,TAPBP,SEMA4D,TNFRSF25	1.38751e-38	6.79878e-36

## Sheet: Table S4
Supplementary Table 4: List of breast cancer data sets included in the study
Reference	Source of data	N° of samples	Technological platform	N° of probe sets	N° of primary BC	N° of TNBC
van de Vijver et al., NEJM 2002	http://microarray-pubs.stanford.edu/wound_NKI/	295	Agilent Hu25K	25K	254	36
Minn AJ et al., Nature 2005	GEO: GSE2603	99	Affymetrix U133A	22K	99	28
Wang Y et al., Lancet 2005	GEO: GSE2034	286	Affymetrix U133A	22K	286	48
Ivshina et al., Cancer Res 2006	GEO: GSE4922, GSE1456	448	Affymetrix U133 A+B	2x22K	408	50
Sotiriou C et al., J Natl Cancer Inst 2006	GEO: GSE2990	189	Affymetrix U133A	22K	80	5
Desmedt C etal., Clin Cancer Res 2007	GEO: GSE7390	198	Affymetrix U133A	22K	154	30
Merritt WM et al., N Engl J Med 2008	Array Express: E-MTAB-158	130	Affymetrix U133AAofAv2	23K	130	31
Schmidt M etal., Cancer Res 2008	GEO: GSE11121	200	Affymetrix U133A	22K	200	23
Bos et al., Nature 2009	GEO: GSE12276	204	Affymetrix U133 Plus 2.0	54K	204	62
Zhang Y et al., Breast Cancer Res Treat 2009	GEO: GSE12093	136	Affymetrix U133A	22K	136	1
Desmedt et al., J Clin Oncol 2011	GEO: GSE16446	120	Affymetrix U133 Plus 2.0	54K	120	62
Guedj et al., Oncogene 2011	Array Express: E-MTAB-365	537	Affymetrix U133 Plus 2.0	54K	452	12
Hatzis C et al., JAMA 2011	GEO: GSE25066	508	Affymetrix U133A	22K	504	201
TCGA, Nature 2012	TCGA Data Portal - BRCA -	1215	Illumina, RNAseq V2	20K	1092	199
Curtis et al., Nature 2012	EGA: EGAS00000000083	2136	Illumina HT 12	49K	1974	335
Sabatier R et al., (our IPC series) PLoS One 2011	GEO: GSE31448	353	Affymetrix U133 Plus 2.0	54K	286	103
TOTAL		7054			6379	1226
